# Supplementary material for: Genotypic resistance testing in HIV by arrayed primer extension
Source: PubMed Central journal article supplement — Anal Bioanal Chem. 2008 Jan 18;391(5):1661–9. doi: 10.1007/s00216-007-1775-0 (PMC2441534; doi:10.1007/s00216-007-1775-0), 2008-01-18
Supplement: 216_2007_1775_MOESM1_ESM.pdf [file 216_2007_1775_MOESM1_ESM.pdf]

## Supplementary information

All oligonucleotides were purchased from biomers (Ulm, Germany) or MWG (Ebersberg, Germany). Each one was 50 nucleotides in length, containing a C6-aminolinker and a 20-25mer oligo-dT spacer at the 5'-end.

### Oligonucleotides for the HIV protease array

| position            |                                | name                           | sequence 5'-3'                 | length | 1. array | 2. array |
|---------------------|--------------------------------|--------------------------------|--------------------------------|--------|----------|----------|
| 10                  | 28                             | PR_AS10_f1(20)_28_C            | TCACTCTTTGGCAGCGACCC           | 20     | x        |          |
|                     |                                | PR_AS10_f1(30)_28_C            | CCTCAGATCACTCTTTGGCAGCGACCC    | 27     | x        | x        |
|                     |                                | PR_AS10_f1_29_T                | CACTCTTTGGCAGCGACCC            | 20     | x        | x        |
|                     | 29                             | PR_AS10_f2(28)_29_T            | CCTCARATCACTCTTTGGCARGACCCC    | 28     | x        | x        |
|                     |                                | PR_AS10_f3(28)_29_T            | CCTCARATCACTCTTTGGCARGACCCA    | 28     | x        | x        |
|                     |                                | PR_AS10_f4(28)_29_T            | CCTCARATCACTCTTTGGCARGACCCA    | 28     | x        | x        |
|                     |                                | PR_AS10_f5(28)_29_T            | CCTCARATCACTCTTTGGCARGACCCA    | 28     | x        | x        |
|                     | 30                             | PR_AS10_f1_30_C                | ACTCTTTGGCAGCGACCCCT           | 20     | x        | x        |
|                     |                                | PR_AS10_f2(29)_30_C            | CCTCARATCACTCTTTGGCARGACCCCT   | 29     | x        | x        |
|                     |                                | PR_AS10_f3(29)_30_C            | CCTCARATCACTCTTTGGCARGACCCAT   | 29     | x        | x        |
|                     |                                | PR_AS10_f4(29)_30_C            | CCTCARATCACTCTTTGGCARGACCCCT   | 29     | x        | x        |
|                     |                                | PR_AS10_f5(29)_30_C            | CCTCARATCACTCTTTGGCARGACCCGT   | 29     | x        | x        |
|                     |                                | PR_AS10_f6(29)_30_C            | CCTCARATCACTCTTTGGCARGACCCCG   | 29     | x        | x        |
|                     |                                | PR_AS10_f7(29)_30_C            | CCTCARATCACTCTTTGGCARGACCCAG   | 29     | x        | x        |
| PR_AS10_f8(29)_30_C |                                | CCTCARATCACTCTTTGGCARGACCCCTG  | 29                             | x      | x        |          |
| PR_AS10_f9(29)_30_C |                                | CCTCARATCACTCTTTGGCARGACCCGG   | 29                             | x      | x        |          |
| 20                  | 58                             | PR_AS20_r1(30)_58_T            | CATCTGCTCCTGTATCTAATAGAGCTTCCT | 30     | x        | x        |
|                     |                                | PR_AS20_r2(30)_58_T            | CATCTGCTCCTGTTRCTAATAGAGCTTCCT | 30     | x        | x        |
|                     |                                | PR_AS20_r3(30)_58_T            | CATCTGCTCCTGTTRCTAATAGAGCTTCCA | 30     | x        | x        |
|                     |                                | PR_AS20_r4(30)_58_T            | CATCTGCTCCTGTTRCTAATAGAGCTTCCC | 30     | x        | x        |
|                     |                                | PR_AS20_r5(30)_58_T            | CATCTGCTCCTGTTRCTAATAGAGCTTCTT | 30     | x        | x        |
|                     |                                | PR_AS20_r6(30)_58_T            | CATCTGCTCCTGTTRCTAATAGAGCTTCTA | 30     | x        | x        |
|                     |                                | PR_AS20_r7(30)_58_T            | CATCTGCTCCTGTTRCTAATAGAGCTTCTC | 30     | x        | x        |
|                     |                                | PR_AS20_r8(30)_58_T            | CATCTGCTCCTGTTRCTAATAGAGCTTCCG | 30     | x        | x        |
|                     |                                | PR_AS20_r9(30)_58_T            | CATCTGCTCCTGTTRCTAATAGAGCTTCTG | 30     | x        | x        |
|                     |                                | PR_AS20_r10(30)_58_T           | CATCTGCTCCTGTTRCTAATAGAGCTTCAT | 30     | x        | x        |
|                     |                                | PR_AS20_r11(30)_58_T           | CATCTGCTCCTGTTRCTAATAGAGCTTCAA | 30     | x        | x        |
|                     |                                | PR_AS20_r12(30)_58_T           | CATCTGCTCCTGTTRCTAATAGAGCTTCAC | 30     | x        | x        |
|                     |                                | PR_AS20_r13(30)_58_T           | CATCTGCTCCTGTTRCTAATAGAGCTTCAG | 30     | x        | x        |
|                     |                                | PR_AS20_r14(30)_58_T           | CATCTGCTCCTGTTRCTAATAGAGCTTCGT | 30     | x        | x        |
|                     | PR_AS20_r15(30)_58_T           | CATCTGCTCCTGTTRCTAATAGAGCTTCGA | 30                             | x      | x        |          |
|                     | PR_AS20_r16(30)_58_T           | CATCTGCTCCTGTTRCTAATAGAGCTTCGG | 30                             | x      | x        |          |
|                     | PR_AS20_r17(30)_58_T           | CATCTGCTCCTGTTRCTAATAGAGCTTCGC | 30                             | x      | x        |          |
| 59                  | PR_AS20_r1(20)_59_T            | CTGTATCTAATAGAGCTTCC           | 20                             | x      | x        |          |
|                     | PR_AS20_r1(30)_59_T            | TCATCTGCTCCTGTATCTAATAGAGCTTCC | 30                             | x      | x        |          |
|                     | PR_AS20_r2(30)_59_T            | TCATCTGCTCCTGTTRCTAATAGAGCTTCC | 30                             | x      | x        |          |
|                     | PR_AS20_r3(30)_59_T            | TCATCTGCTCCTGTTRCTAATAGAGCTTCT | 30                             | x      | x        |          |
|                     | PR_AS20_r4(30)_59_T            | TCATCTGCTCCTGTTRCTAATAGAGCTTCA | 30                             | x      | x        |          |
| PR_AS20_r5(30)_59_T | TCATCTGCTCCTGTTRCTAATAGAGCTTCG | 30                             | x                              | x      |          |          |
| 60                  | PR_AS20_r1(20)_60_C            | CCTGTATCTAATAGAGCTTC           | 20                             | x      | x        |          |
|                     | PR_AS20_r1(30)_60_C            | ATCATCTGCTCCTGTATCTAATAGAGCTTC | 30                             | x      | x        |          |
|                     | PR_AS20_r2(30)_60_C            | ATCATCTGCTCCTGTTRCTAATAGAGCTTC | 30                             | x      | x        |          |
| 23                  | 67                             | PR_AS23_r1_67_G                | ATACTGTATCATCTGCTCCTGTATCTAATA | 30     | x        |          |
|                     |                                | PR_AS23_r2_67_G                | ATACTGTATCATCTGCTCCTGTGTCTAATA | 30     | x        | x        |
|                     |                                | PR_AS23_f1_67_C                | ATAAAGATAGGGGGGCARITAAAGGAAGCT | 30     |          | x        |
|                     |                                | PR_AS23_f2_67_C                | ATAAAGATAGGGGGGCARITAAAGGAAGCT | 30     |          | x        |
|                     |                                | PR_AS23_f3_67_C                | ATAAAGATAGGGGGGCARITAAAGGAAGCT | 30     |          | x        |
|                     |                                | PR_AS23_f4_67_C                | ATAAAGATAGGGGGGCARITAAAGGAAGCT | 30     |          | x        |
|                     |                                | PR_AS23_f5_67_C                | ATAAAGATAGGGGGGCARITAAAGGAAGCT | 30     |          | x        |
| PR_AS23_f6_67_C     | ATAAAGATAGGGGGGCARITAAAGGAAGCT | 30                             |                                | x      |          |          |

|    |                 |                                |                                |    |   |   |
|----|-----------------|--------------------------------|--------------------------------|----|---|---|
| 68 | PR_AS23_r1_68_A | AATACTGTATCATCTGCTCCTGTATCTAAT | 30                             | x  | x |   |
|    | PR_AS23_r2_68_A | AATACTGTATCATCTGCTCCTGTGTCTAAT | 30                             | x  | x |   |
| 69 | PR_AS23_r1_69_T | TAATACTGTATCATCTGCTCCTGTATCTAA | 30                             | x  | x |   |
|    | PR_AS23_r2_69_T | TAATACTGTATCATCTGCTCCTGTGTCTAA | 30                             | x  | x |   |
| 24 | 70              | PR_AS24_r_70_A                 | ATCATCTGCTCCTGTATCTA           | 20 | x | x |
|    |                 | PR_AS24_r2(29)_70_A            | CTAATACTGTATCATCTGCTCTGTATCTA  | 29 | x | x |
|    |                 | PR_AS24_r3(29)_70_A            | CTAATACTGTATCATCTGCTCTGTGTCTA  | 29 | x | x |
|    | 71              | PR_AS24_r_71_A                 | TATCATCTGCTCCTGTATCT           | 20 | x | x |
|    |                 | PR_AS24_r2(30)_71_A            | TCTAATACTGTATCATCTGCTCCTGTATCT | 30 | x | x |
|    |                 | PR_AS24_r3(30)_71_A            | TCTAATACTGTATCATCTGCTCCTGTGTCT | 30 | x | x |
|    | 72              | PR_AS24_r_72_T                 | GTATCATCTGCTCCTGTATC           | 20 | x | x |
|    |                 | PR_AS24_r2_72_T                | GTATCATCTGCTCCTGTGTC           | 20 | x | x |
|    |                 | PR_AS24_r2(30)_72_T            | TTCTAATACTGTATCATCTGCTCCTGTATC | 30 | x | x |
|    |                 | PR_AS24_r3(30)_72_T            | TTCTAATACTGTATCATCTGCTCCTGTGTC | 30 | x | x |
| 30 | 88              | PR_AS30_f_88_G                 | TATTAGATACAGGAGCAGAT           | 20 | x | x |
|    |                 | PR_AS30_f(30)_88_G             | GAAGCTCTATTAGATACAGGAGCAGAT    | 27 | x | x |
|    |                 | PR_AS30_f2(27)_88_G            | GAAGCTCTATTAGAYACAGGAGCAGAT    | 27 | x | x |
|    |                 | PR_AS30_r1_88_C                | AAAYTCATITCTTCTAATACTGTAT      | 25 |   | x |
|    |                 | PR_AS30_r2_88_C                | AAAYTTATITCTTCTAATACTGTAT      | 25 |   | x |
|    |                 | PR_AS30_r3_88_C                | AAAYCCATITCTTCTAATACTGTAT      | 25 |   | x |
|    |                 | PR_AS30_r4_88_C                | AAAYCTATITCTTCTAATACTGTAT      | 25 |   | x |
|    | 89              | PR_AS30_f_89_A                 | ATTAGATACAGGAGCAGATG           | 20 | x | x |
|    |                 | PR_AS30_f2(28)_89_A            | GAAGCTCTATTAGAYACAGGAGCAGATG   | 28 | x | x |
|    |                 | PR_AS30_f3(28)_89_A            | GAAGCTCTATTAGAYACAGGAGCAGATA   | 28 | x | x |
|    | 90              | PR_AS30_f_90_T                 | TTAGATACAGGAGCAGATGA           | 20 | x | x |
|    |                 | PR_AS30_f2(29)_90_T            | GAAGCTCTATTAGAYACAGGAGCAGATGA  | 29 | x | x |
|    |                 | PR_AS30_f3(29)_90_T            | GAAGCTCTATTAGAYACAGGAGCAGATAA  | 29 | x | x |
| 32 | 94              | PR_AS32_f_94_G                 | ATACAGGAGCAGATGATACA           | 20 | x | x |
|    |                 | PR_AS32_f2(30)_94_G            | GCTCTATTAGAYACAGGAGCAGATGATACA | 30 | x | x |
|    | 95              | PR_AS32_f_95_T                 | TACAGGAGCAGATGATACAG           | 20 | x | x |
|    |                 | PR_AS32_f2(30)_95_T            | CTCTATTAGAYACAGGAGCAGATGATACAG | 30 | x | x |
|    |                 | PR_AS32_f3(30)_95_T            | CTCTATTAGAYACAGGAGCAGATGATACAA | 30 | x | x |
|    | 96              | PR_AS32_f_96_A                 | ACAGGAGCAGATGATACAGT           | 20 | x | x |
|    |                 | PR_AS32_f2(30)_96_A            | TCTATTAGAYACAGGAGCAGATGATACAGT | 30 | x | x |
|    |                 | PR_AS32_f3(30)_96_A            | TCTATTAGAYACAGGAGCAGATGATACAAT | 30 | x | x |
| 33 | 97              | PR_AS33_f_97_T                 | CAGGAGCAGATGATACAGTA           | 20 | x | x |
|    |                 | PR_AS33_f(30)_97_T             | CTATTAGAYACAGGAGCAGATGATACAGTA | 30 | x | x |
|    | 98              | PR_AS33_f_98_T                 | AGGAGCAGATGATACAGTAT           | 20 | x | x |
|    |                 | PR_AS33_f(30)_98_T             | TATTAGAYACAGGAGCAGATGATACAGTAT | 30 | x | x |
|    |                 | PR_AS33_f2(30)_98_T            | TATTAGAYACAGGAGCAGATGATACAGTAG | 30 | x | x |
|    |                 | PR_AS33_f3(30)_98_T            | TATTAGAYACAGGAGCAGATGATACAGTAA | 30 | x | x |
|    | 99              | PR_AS33_f_99_A                 | GGAGCAGATGATACAGTATT           | 20 | x | x |
|    |                 | PR_AS33_f2(30)_99_A            | ATTAGAYACAGGAGCAGATGATACAGTATT | 30 | x | x |
|    |                 | PR_AS33_f3(30)_99_A            | ATTAGAYACAGGAGCAGATGATACAGTAGT | 30 | x | x |
|    |                 | PR_AS33_f4(30)_99_A            | ATTAGAYACAGGAGCAGATGATACAGTAAT | 30 | x | x |
| 36 | 106             | PR_AS36_f_106_A                | ATGATACAGTATTAGAAGAA           | 20 | x | x |
|    |                 | PR_AS36_f2(30)_106_A           | ACAGGAGCAGATGATACAGTATTAGAAGAA | 30 | x | x |
|    |                 | PR_AS36_f3(30)_106_A           | ACAGGAGCAGATGATACAGTATTAGAAGAT | 30 | x | x |
|    |                 | PR_AS36_f4(30)_106_A           | ACAGGAGCAGATGATACAGTATTAGAAGAC | 30 | x | x |
|    | 107             | PR_AS36_f2(30)_107_T           | CAGGAGCAGATGATACAGTATTAGAAGAAA | 30 | x | x |
|    |                 | PR_AS36_f3(30)_107_T           | CAGGAGCAGATGATACAGTATTAGAAGATA | 30 | x | x |
|    |                 | PR_AS36_f4(30)_107_T           | CAGGAGCAGATGATACAGTATTAGAAGACA | 30 | x | x |
|    |                 | PR_AS36_f5(30)_107_T           | CAGGAGCAGATGATACAGTATTAGAAGAAG | 30 | x | x |
|    |                 | PR_AS36_f6(30)_107_T           | CAGGAGCAGATGATACAGTATTAGAAGATG | 30 | x | x |
|    |                 | PR_AS36_f7(30)_107_T           | CAGGAGCAGATGATACAGTATTAGAAGACG | 30 | x | x |
|    |                 | PR_AS36_f8(30)_107_T           | CAGGAGCAGATGATACAGTATTAGAAGAAT | 30 | x | x |
|    |                 | PR_AS36_f9(30)_107_T           | CAGGAGCAGATGATACAGTATTAGAAGATT | 30 | x | x |
|    |                 | PR_AS36_f10(30)_107_T          | CAGGAGCAGATGATACAGTATTAGAAGACT | 30 | x | x |
|    |                 | PR_AS36_f11(30)_107_T          | CAGGAGCAGATGATACAGTATTAGAAGAAC | 30 | x | x |
|    |                 | PR_AS36_f12(30)_107_T          | CAGGAGCAGATGATACAGTATTAGAAGATC | 30 | x | x |
|    |                 | PR_AS36_f13(30)_107_T          | CAGGAGCAGATGATACAGTATTAGAAGACC | 30 | x | x |
|    | 108             | PR_AS36_f_108_G                | GATACAGTATTAGAAGAAAT           | 20 | x | x |
|    |                 | PR_AS36_f(30)_108_G            | AGGAGCAGATGATACAGTATTAGAAGAAAT | 30 | x | x |
|    |                 | PR_AS36_f2(30)_108_G           | AGGAGCAGATGATACAGTATTAGAAGATAT | 30 | x | x |
|    |                 | PR_AS36_f3(30)_108_G           | AGGAGCAGATGATACAGTATTAGAAGACAT | 30 | x | x |
|    |                 | PR_AS36_f4(30)_108_G           | AGGAGCAGATGATACAGTATTAGAAGAAGT | 30 | x | x |

|    |     |                       |                                   |    |   |   |
|----|-----|-----------------------|-----------------------------------|----|---|---|
|    |     | PR_AS36_f5(30)_108_G  | AGGAGCAGATGATACAGTATTAGAAGATGT    | 30 | x | x |
|    |     | PR_AS36_f6(30)_108_G  | AGGAGCAGATGATACAGTATTAGAAGACGT    | 30 | x |   |
|    |     | PR_AS36_f7(30)_108_G  | AGGAGCAGATGATACAGTATTAGAAGAATT    | 30 | x | x |
|    |     | PR_AS36_f8(30)_108_G  | AGGAGCAGATGATACAGTATTAGAAGATTT    | 30 | x | x |
|    |     | PR_AS36_f9(30)_108_G  | AGGAGCAGATGATACAGTATTAGAAGACTT    | 30 | x | x |
|    |     | PR_AS36_f10(30)_108_G | AGGAGCAGATGATACAGTATTAGAAGAACT    | 30 | x | x |
|    |     | PR_AS36_f11(30)_108_G | AGGAGCAGATGATACAGTATTAGAAGATCT    | 30 | x | x |
|    |     | PR_AS36_f12(30)_108_G | AGGAGCAGATGATACAGTATTAGAAGACCT    | 30 | x | x |
|    |     | PR_AS36_f13(30)_108_G | AGGAGCAGATGATACAGTATTAGAAGAAAC    | 30 | x | x |
|    |     | PR_AS36_f14(30)_108_G | AGGAGCAGATGATACAGTATTAGAAGATAC    | 30 | x | x |
|    |     | PR_AS36_f15(30)_108_G | AGGAGCAGATGATACAGTATTAGAAGACAC    | 30 | x | x |
|    |     | PR_AS36_f16(30)_108_G | AGGAGCAGATGATACAGTATTAGAAGAAGC    | 30 | x | x |
|    |     | PR_AS36_f17(30)_108_G | AGGAGCAGATGATACAGTATTAGAAGATGC    | 30 | x | x |
|    |     | PR_AS36_f18(30)_108_G | AGGAGCAGATGATACAGTATTAGAAGACGC    | 30 | x | x |
|    |     | PR_AS36_f19(30)_108_G | AGGAGCAGATGATACAGTATTAGAAGAATC    | 30 | x | x |
|    |     | PR_AS36_f20(30)_108_G | AGGAGCAGATGATACAGTATTAGAAGATTC    | 30 | x | x |
|    |     | PR_AS36_f21(30)_108_G | AGGAGCAGATGATACAGTATTAGAAGACTC    | 30 | x | x |
|    |     | PR_AS36_f22(30)_108_G | AGGAGCAGATGATACAGTATTAGAAGAACC    | 30 | x | x |
|    |     | PR_AS36_f23(30)_108_G | AGGAGCAGATGATACAGTATTAGAAGATCC    | 30 | x | x |
|    |     | PR_AS36_f24(30)_108_G | AGGAGCAGATGATACAGTATTAGAAGACCC    | 30 | x | x |
|    |     | PR_AS36_r1_108_C      | ATTTTTGGTTTTCCATYTYCCTGGCAAATT    | 29 |   | x |
|    |     | PR_AS36_r2_108_C      | ATTTTTGGTTTTCCATYTYCCTGGCAAATC    | 29 |   | x |
|    |     | PR_AS36_r3_108_C      | ATTTTTGGTTTTCCATYTYCCTGGCAAACCT   | 29 |   | x |
|    |     | PR_AS36_r4_108_C      | ATTTTTGGTTTTCCATYTYCCTGGCAAACC    | 29 |   | x |
|    |     | PR_AS36_r5_108_C      | ATTTTTGGTTTTCCATYTYCCTGGTAAATT    | 29 |   | x |
|    |     | PR_AS36_r6_108_C      | ATTTTTGGTTTTCCATYTYCCTGGTAAATC    | 29 |   | x |
|    |     | PR_AS36_r7_108_C      | ATTTTTGGTTTTCCATYTYCCTGGTAAACT    | 29 |   | x |
|    |     | PR_AS36_r8_108_C      | ATTTTTGGTTTTCCATYTYCCTGGTAAACC    | 29 |   | x |
| 46 | 136 | PR_AS46_r_136_T       | ACCTCCAATTCCTCCCTATCA             | 20 | x | x |
|    |     | PR_AS46_r2_136_T      | ACCTCCAATTCCTCCCTATTA             | 20 | x | x |
|    |     | PR_AS46_r3_136_T      | ACCTCCAATTCCTCCCTATAA             | 20 | x | x |
|    |     | PR_AS46_r4_136_T      | ACCTCCAATTCCTCCCTATGA             | 20 | x | x |
|    | 137 | PR_AS46_r_137_A       | AACCTCCAATTCCTCCCTATC             | 20 | x | x |
|    |     | PR_AS46_r2_137_A      | AACCTCCAATTCCTCCCTATT             | 20 | x | x |
|    |     | PR_AS46_r3_137_A      | AACCTCCAATTCCTCCCTATA             | 20 | x | x |
|    |     | PR_AS46_r4_137_A      | AACCTCCAATTCCTCCCTATG             | 20 | x | x |
|    | 138 | PR_AS46_r_138_C       | AAACCTCCAATTCCTCCCTAT             | 20 | x | x |
| 47 | 139 | PR_AS47_r_139_T       | AAAACCTCCAATTCCTCCCA              | 20 | x | x |
|    |     | PR_AS47_r(30)_139_T   | TTACTTTTGAYAAAACCTCCAATTCCTCCCA   | 30 | x | x |
|    |     | PR_AS47_r2(30)_139_T  | TTACTTTTGAYAAAACCTCCAATTCCTCCCTA  | 30 | x | x |
|    |     | PR_AS47_f1_139_A      | TTTRCCAGGRAGATGGAAACCAAAAATG      | 28 |   | x |
|    |     | PR_AS47_f2_139_A      | TTTRCCAGGRAGATGGAAACCAAAAATA      | 28 |   | x |
|    |     | PR_AS47_f3_139_A      | TTTRCCAGGRAAATGGAAACCAAAAATG      | 28 |   | x |
|    |     | PR_AS47_f4_139_A      | TTTRCCAGGRAAATGGAAACCAAAAATA      | 28 |   | x |
|    | 140 | PR_AS47_r_140_A       | TAAAACCTCCAATTCCTCCCT             | 20 | x | x |
|    |     | PR_AS47_r2_140_A      | CAAAACCTCCAATTCCTCCCT             | 20 | x | x |
|    |     | PR_AS47_r(29)_140_A   | TTACTTTTGAYAAAACCTCCAATTCCTCCCA   | 29 | x | x |
|    |     | PR_AS47_r2(29)_140_A  | TTACTTTTGAYAAAACCTCCAATTCCTCCCT   | 29 | x | x |
|    | 141 | PR_AS47_r3(28)_141_T  | TTACTTTTGAYAAAACCTCCAATTCCTCCCA   | 28 | x | x |
| 48 | 142 | PR_AS48_r_142_C       | GATAAAACCTCCAATTCCTCC             | 20 | x | x |
|    |     | PR_AS48_r2_142_C      | GACAAAACCTCCAATTCCTCC             | 20 | x | x |
|    |     | PR_AS48_r2_142_C      | GTYYTTACTTTTGAYAAAACCTCCAATTCCTCA | 30 | x | x |
|    | 143 | PR_AS48_r_143_C       | TGATAAAACCTCCAATTCCTCC            | 20 | x | x |
|    |     | PR_AS48_r2(30)_143_C  | TGTYTTACTTTTGAYAAAACCTCCAATTCCTCC | 30 | x | x |
|    | 144 | PR_AS48_r_144_C       | TTGATAAAACCTCCAATTCCTCC           | 20 | x | x |
|    |     | PR_AS48_r2(29)_144_C  | TGTYTTACTTTTGAYAAAACCTCCAATTCCTCC | 29 | x | x |
| 50 | 148 | PR_AS50_f_148_A       | AACCAAAAATGATAGGGGGA              | 20 | x | x |
|    |     | PR_AS50_f2(27)_148_A  | ARATGGAAACCAAAAATGATAGGGGGA       | 27 | x | x |
|    |     | PR_AS50_f3(27)_148_A  | ARATGGAAACCAAAAATAATAGGGGGA       | 27 | x | x |
|    | 149 | PR_AS50_f_149_T       | ACC AAAAATGATAGGGGGA              | 20 | x | x |
|    |     | PR_AS50_f2(28)_149_T  | ARATGGAAACCAAAAATRATAGGGGGAA      | 28 | x | x |
|    |     | PR_AS50_f3(28)_149_T  | ARATGGAAACCAAAAATRATAGGGGGAG      | 28 | x | x |
|    |     | PR_AS50_f4(28)_149_T  | ARATGGAAACCAAAAATRATAGGGGGAC      | 28 | x | x |
|    | 150 | PR_AS50_f_150_T       | CCAAAATGATAGGGGGAAT               | 20 | x | x |
|    |     | PR_AS50_f2(29)_150_T  | ARATGGAAACCAAAAATRATAGGGGGAAAT    | 29 | x | x |
|    |     | PR_AS50_f3(29)_150_T  | ARATGGAAACCAAAAATRATAGGGGGAGT     | 29 | x | x |
|    |     | PR_AS50_f4(29)_150_T  | ARATGGAAACCAAAAATRATAGGGGGACT     | 29 | x | x |

|    |     |                      |                                 |    |   |   |
|----|-----|----------------------|---------------------------------|----|---|---|
| 53 | 157 | PR_AS53_f_157_T      | TGATAGGGGGAATTGGAGGT            | 20 | x | x |
|    |     | PR_AS53_f2(30)_157_T | AAACCAAAAATRATAGGGGGAATTGGAGGT  | 30 | x | x |
|    | 158 | PR_AS53_f_158_T      | GATAGGGGGAATTGGAGGTT            | 20 | x | x |
|    |     | PR_AS53_f2(30)_158_T | AACCAAAAATRATAGGGGGAATTGGAGGTT  | 30 | x | x |
|    |     | PR_AS53_f3(30)_158_T | AACCAAAAATRATAGGGGGAATTGGAGGTC  | 30 | x | x |
|    |     | PR_AS53_f4(30)_158_T | AACCAAAAATRATAGGGGGAATTGGAGGTA  | 30 | x | x |
|    | 159 | PR_AS53_f_159_T      | ATAGGGGGAATTGGAGGTTT            | 20 | x | x |
|    |     | PR_AS53_f2(30)_159_T | ACCAAAAATRATAGGGGGAATTGGAGGTTT  | 30 | x | x |
|    |     | PR_AS53_f3(30)_159_T | ACCAAAAATRATAGGGGGAATTGGAGGTTA  | 30 | x | x |
|    |     | PR_AS53_f4(30)_159_T | ACCAAAAATRATAGGGGGAATTGGAGGTCT  | 30 | x | x |
|    |     | PR_AS53_f5(30)_159_T | ACCAAAAATRATAGGGGGAATTGGAGGTCA  | 30 | x | x |
|    |     | PR_AS53_f6(30)_159_T | ACCAAAAATRATAGGGGGAATTGGAGGTAT  | 30 | x | x |
| 54 | 160 | PR_AS54_f_160_A      | TAGGGGGAATTGGAGGTTTT            | 20 | x | x |
|    |     | PR_AS54_f2(30)_160_A | CCAAAAATRATAGGGGGAATTGGAGGTTTT  | 30 | x | x |
|    | 161 | PR_AS54_f_161_T      | AGGGGGAATTGGAGGTTTTA            | 20 | x | x |
|    |     | PR_AS54_f2_161_T     | AGGGGGAATTGGAGGTTTTG            | 20 | x | x |
|    |     | PR_AS54_f3(30)_161_T | CAAAAATRATAGGGGGAATTGGAGGTTTTTC | 30 | x | x |
|    | 162 | PR_AS54_f_162_C      | GGGGGAATTGGAGGTTTTAT            | 20 | x | x |
|    |     | PR_AS54_f2_162_C     | GGGGGAATTGGAGGTTTTGT            | 20 | x | x |
|    |     | PR_AS54_f3(30)_162_C | AAAAATRATAGGGGGAATTGGAGGTTTTCT  | 30 | x | x |
|    |     | PR_AS54_f5(30)_162_C | AAAAATRATAGGGGGAATTGGAGGTTTTGA  | 30 | x | x |
|    |     | PR_AS54_f6(30)_162_C | AAAAATRATAGGGGGAATTGGAGGTTTTCA  | 30 | x | x |
| 60 | 178 | PR_AS60_f_178_G      | TTATCAAAGTAAAACAGTAT            | 20 | x | x |
|    |     | PR_AS60_f2(30)_178_G | ATTGGAGGTTTTTRTCAAAGTAARACAGTAT | 30 | x | x |
|    |     | PR_AS60_f3(30)_178_G | ATTGGAGGTTTTTRTCAAAGTAARACAATAT | 30 | x | x |
|    |     | PR_AS60_r1_178_C     | CCGCAGATTTCTAYIAGTATCTGAT       | 25 |   | x |
|    |     | PR_AS60_r2_178_C     | CCGCAGATTTCTAYIAGTATTTGAT       | 25 |   | x |
|    |     | PR_AS60_r3_178_C     | CCGCAGATTTCTAYIAGTACCTGAT       | 25 |   | x |
|    |     | PR_AS60_r4_178_C     | CCGCAGATTTCTAYIAGTACTTGAT       | 25 |   | x |
|    |     | PR_AS60_r5_178_C     | CCGCAGATTTCTAYIGGTATCTGAT       | 25 |   | x |
|    |     | PR_AS60_r6_178_C     | CCGCAGATTTCTAYIGGTATTTGAT       | 25 |   | x |
|    |     | PR_AS60_r7_178_C     | CCGCAGATTTCTAYIGGTACCTGAT       | 25 |   | x |
|    |     | PR_AS60_r8_178_C     | CCGCAGATTTCTAYIGGTACTTGAT       | 25 |   | x |
|    | 179 | PR_AS60_f_179_A      | TATCAAAGTAAAACAGTATG            | 20 | x | x |
|    |     | PR_AS60_f2_179_A     | TRTCAAAGTAARACAATATG            | 20 | x | x |
|    |     | PR_AS60_f3(30)_179_A | TTGGAGGTTTTTRTCAAAGTAARACAATATG | 30 | x | x |
|    |     | PR_AS60_f4(30)_179_A | TTGGAGGTTTTTRTCAAAGTAARACAGTATG | 30 | x | x |
|    | 180 | PR_AS60_f_180_T      | ATCAAAGTAAAACAGTATGA            | 20 | x | x |
|    |     | PR_AS60_f2(30)_180_T | TGGAGGTTTTTRTCAAAGTAAGACAGTATGA | 30 | x | x |
|    |     | PR_AS60_f3(30)_180_T | TGGAGGTTTTTRTCAAAGTAARACAGTATGA | 30 | x | x |
|    |     | PR_AS60_f4(30)_180_T | TGGAGGTTTTTRTCAAAGTAARACAATATGA | 30 | x | x |
| 62 | 184 | PR_AS62_f1(30)_184_A | GGTTTTTRTCAAAGTAARACAGTATGATCAG | 30 | x | x |
|    |     | PR_AS62_f2(30)_184_A | GGTTTTTRTCAAAGTAARACAGTATGATCAA | 30 | x | x |
|    |     | PR_AS62_f3(30)_184_A | GGTTTTTRTCAAAGTAARACAATATGATCAG | 30 | x | x |
|    |     | PR_AS62_f4(30)_184_A | GGTTTTTRTCAAAGTAARACAATATGATCAA | 30 | x | x |
|    |     | PR_AS62_r1_184_T     | C'TTTATGTCCRCARATTTCTATGAGTA    | 27 |   | x |
|    |     | PR_AS62_r2_184_T     | C'TTTATGTCCRCARATTTCTATGAGTA    | 27 |   | x |
|    |     | PR_AS62_r3_184_T     | C'TTTATGTCCRCARATTTCTATAAGTA    | 27 |   | x |
|    |     | PR_AS62_r4_184_T     | C'TTTATGTCCRCARATTTCTATAAGTA    | 27 |   | x |
|    |     | PR_AS62_r5_184_T     | C'TTTATGTCCRCARATTTCTATTAGTA    | 27 |   | x |
|    |     | PR_AS62_r6_184_T     | C'TTTATGTCCRCARATTTCTATTAGTA    | 27 |   | x |
|    |     | PR_AS62_r7_184_T     | C'TTTATGTCCRCARATTTCTAAGAGTA    | 27 |   | x |
|    |     | PR_AS62_r8_184_T     | C'TTTATGTCCRCARATTTCTAAGAGTA    | 27 |   | x |
|    |     | PR_AS62_r9_184_T     | C'TTTATGTCCRCARATTTCTAAAAGTA    | 27 |   | x |
|    |     | PR_AS62_r10_184_T    | C'TTTATGTCCRCARATTTCTAAAAGTA    | 27 |   | x |
|    |     | PR_AS62_r11_184_T    | C'TTTATGTCCRCARATTTCTAATAGTA    | 27 |   | x |
|    |     | PR_AS62_r12_184_T    | C'TTTATGTCCRCARATTTCTAATAGTA    | 27 |   | x |
|    | 185 | PR_AS62_f1(30)_185_T | G'TTTTRTCAAAGTAARACARTATGATCAGG | 30 | x | x |
|    |     | PR_AS62_f2(30)_185_T | G'TTTTRTCAAAGTAARACARTATGATCAAA | 30 | x | x |
|    |     | PR_AS62_f3(30)_185_T | G'TTTTRTCAAAGTAARACARTATGATCAGA | 30 | x | x |
|    |     | PR_AS62_f4(30)_185_T | G'TTTTRTCAAAGTAARACARTATGATCAAG | 30 | x | x |
|    |     | PR_AS62_r1_185_T     | C'TTTATGTCCRCARATTTCTATGAGT     | 26 |   | x |
|    |     | PR_AS62_r2_185_T     | C'TTTATGTCCRCARATTTCTATGAGT     | 26 |   | x |
|    |     | PR_AS62_r3_185_T     | C'TTTATGTCCRCARATTTCTATAAGT     | 26 |   | x |
|    |     | PR_AS62_r4_185_T     | C'TTTATGTCCRCARATTTCTATAAGT     | 26 |   | x |
|    |     | PR_AS62_r5_185_T     | C'TTTATGTCCRCARATTTCTATTAGT     | 26 |   | x |
|    |     | PR_AS62_r6_185_T     | C'TTTATGTCCRCARATTTCTATTAGT     | 26 |   | x |

|     |     |                      |                                |    |   |   |
|-----|-----|----------------------|--------------------------------|----|---|---|
|     |     | PR_AS62_r7_185_T     | CTTTATGTCCRCARATTTCTAAGAGT     | 26 |   | x |
|     |     | PR_AS62_r8_185_T     | CTTTATGTCCRCARATTTCTAAGAGT     | 26 |   | x |
|     |     | PR_AS62_r9_185_T     | CTTTATGTCCRCARATTTCTAAAAGT     | 26 |   | x |
|     |     | PR_AS62_r10_185_T    | CTTTATGTCCRCARATTTCTAAAAGT     | 26 |   | x |
|     |     | PR_AS62_r11_185_T    | CTTTATGTCCRCARATTTCTAATAGT     | 26 |   | x |
|     |     | PR_AS62_r12_185_T    | CTTTATGTCCRCARATTTCTAATAGT     | 26 |   | x |
| 186 |     | PR_AS62_f1(30)_186_A | TTTTRTCAAAGTAARACARTATGATCAGGT | 30 | x | x |
|     |     | PR_AS62_f2(30)_186_A | TTTTRTCAAAGTAARACARTATGATCAAAT | 30 | x | x |
|     |     | PR_AS62_f3(30)_186_A | TTTTRTCAAAGTAARACARTATGATCAGAT | 30 | x | x |
|     |     | PR_AS62_f4(30)_186_A | TTTTRTCAAAGTAARACARTATGATCAAGT | 30 | x | x |
| 63  | 187 | PR_AS63_f2(26)_187_C | TCAAAGTAARACARTATGATCAGATA     | 26 | x | x |
|     |     | PR_AS63_f3(26)_187_C | TCAAAGTAARACARTATGATCAGGTA     | 26 | x | x |
|     |     | PR_AS63_f4(26)_187_C | TCAAAGTAARACARTATGATCAAGTA     | 26 | x | x |
|     |     | PR_AS63_f5(26)_187_C | TCAAAGTAARACARTATGATCAAATA     | 26 | x | x |
| 188 |     | PR_AS63_f_188_T      | AAGACAGTATGATCAGATAC           | 20 | x | x |
|     |     | PR_AS63_f2_188_T     | AARACARTATGATCAAGTAC           | 20 | x | x |
|     |     | PR_AS63_f3_188_T     | AARACARTATGATCAAATAC           | 20 | x | x |
|     |     | PR_AS63_f4_188_T     | AARACARTATGATCAGGTAC           | 20 | x | x |
| 189 |     | PR_AS63_f2(28)_189_C | TCAAAGTAARACARTATGATCAGATACT   | 28 | x |   |
|     |     | PR_AS63_r1_189_G     | AGCTTTWTKTCCGCAGATTTCTAT       | 24 |   | x |
|     |     | PR_AS63_r2_189_G     | AGCTTTWTKTCCGCAGATTTCTAC       | 24 |   | x |
|     |     | PR_AS63_r3_189_G     | AGCTTTWTKTCCGCAAATTTCTAT       | 24 |   | x |
|     |     | PR_AS63_r4_189_G     | AGCTTTWTKTCCGCAAATTTCTAC       | 24 |   | x |
|     |     | PR_AS63_r5_189_G     | AGCTTTWTKCCCGCAGATTTCTAT       | 24 |   | x |
|     |     | PR_AS63_r6_189_G     | AGCTTTWTKCCCGCAGATTTCTAC       | 24 |   | x |
|     |     | PR_AS63_r7_189_G     | AGCTTTWTKCCCGCAAATTTCTAT       | 24 |   | x |
|     |     | PR_AS63_r8_189_G     | AGCTTTWTKCCCGCAAATTTCTAC       | 24 |   | x |
|     |     | PR_AS63_r9_189_G     | AGCTTTWTKTCCACAGATTTCTAT       | 24 |   | x |
|     |     | PR_AS63_r10_189_G    | AGCTTTWTKTCCACAGATTTCTAC       | 24 |   | x |
|     |     | PR_AS63_r11_189_G    | AGCTTTWTKTCCACAAATTTCTAT       | 24 |   | x |
|     |     | PR_AS63_r12_189_G    | AGCTTTWTKTCCACAAATTTCTAC       | 24 |   | x |
|     |     | PR_AS63_r13_189_G    | AGCTTTWTKCCACAGATTTCTAT        | 24 |   | x |
|     |     | PR_AS63_r14_189_G    | AGCTTTWTKCCACAGATTTCTAC        | 24 |   | x |
|     |     | PR_AS63_r15_189_G    | AGCTTTWTKCCACAAATTTCTAT        | 24 |   | x |
|     |     | PR_AS63_r16_189_G    | AGCTTTWTKCCACAAATTTCTAC        | 24 |   | x |
| 71  | 211 | PR_AS71_r_211_C      | TACTAATACTGTACCTATAG           | 20 | x | x |
|     |     | PR_AS71_r2(25)_211_C | GGTCCTAYTAAYACTGTACCTATAG      | 25 | x | x |
|     |     | PR_AS71_r3(25)_211_C | GGTCCTAYTAAYACTGTACCTACAA      | 25 | x | x |
|     |     | PR_AS71_r4(25)_211_C | GGTCCTAYTAAYACTGTACCTATAA      | 25 | x |   |
|     |     | PR_AS71_r6(25)_211_C | GGTCCTAYTAAYACTGTACCTACAG      | 25 | x | x |
| 212 |     | PR_AS71_r_212_G      | CTACTAATACTGTACCTATA           | 20 | x | x |
|     |     | PR_AS71_r2(24)_212_G | GGTCCTAYTAAYACTGTACCTATA       | 24 | x | x |
|     |     | PR_AS71_r3(24)_212_G | GGTCCTAYTAAYACTGTACCTACA       | 24 | x | x |
| 213 |     | PR_AS71_r_213_A      | CCTACTAATACTGTACCTAT           | 20 | x | x |
|     |     | PR_AS71_r2(30)_213_A | AGGTGTRGGTCCTAYTAATACTGTACCTAT | 30 | x | x |
|     |     | PR_AS71_r3(30)_213_A | AGGTGTRGGTCCTAYTAATACTGTACCTAC | 30 | x | x |
|     |     | PR_AS71_r4(30)_213_A | AGGTGTRGGTCCTAYTAACACTGTACCTAT | 30 | x | x |
|     |     | PR_AS71_r5(30)_213_A | AGGTGTRGGTCCTAYTAACACTGTACCTAC | 30 | x | x |
| 73  | 217 | PR_AS73_r_217_C      | AGGTCCCTACTAATACTGTAC          | 20 | x | x |
|     |     | PR_AS73_r2(27)_217_C | CAGGTGTRGGTCCTAYTAATACTGTAC    | 27 | x | x |
|     |     | PR_AS73_r3(27)_217_C | CAGGTGTRGGTCCTAYTAACACTGTAC    | 27 | x | x |
|     |     | PR_AS73_r4(27)_217_C | CAGGTGTRGGTCCTAYTAATACTGTAG    | 27 | x | x |
|     |     | PR_AS73_r5(27)_217_C | CAGGTGTRGGTCCTAYTAACACTGTAG    | 27 | x | x |
| 218 |     | PR_AS73_r_218_C      | TAGGTCCCTACTAATACTGTA          | 20 | x | x |
|     |     | PR_AS73_r2(26)_218_C | CAGGTGTRGGTCCTAYTAATACTGTA     | 26 | x | x |
| 219 |     | PR_AS73_r_219_A      | GTAGGTCCCTACTAATACTGT          | 20 | x | x |
|     |     | PR_AS73_r2(30)_219_A | GTTGRCAGGTGTRGGTCCTACTAATACTGT | 30 | x | x |
|     |     | PR_AS73_r3(30)_219_A | GTTGRCAGGTGTRGGTCCTACTAACACTGT | 30 | x | x |
|     |     | PR_AS73_r4(30)_219_A | GTTGRCAGGTGTRGGTCCTATTAATACTGT | 30 | x | x |
|     |     | PR_AS73_r5(30)_219_A | GTTGRCAGGTGTRGGTCCTATTAACACTGT | 30 | x | x |
| 76  | 226 | PR_AS76_r1(30)_226_A | CAATTATGTTGRCAGGTGTRGGTCCTACTA | 30 | x | x |
|     |     | PR_AS76_r2(30)_226_A | CAATTATGTTGRCAGGTGTRGGTCCTATTA | 30 | x | x |
| 227 |     | PR_AS76_r1(30)_227_A | CCAATTATGTTGRCAGGTGTRGGTCCTACT | 30 | x | x |
|     |     | PR_AS76_r2(30)_227_A | CCAATTATGTTGRCAGGTGTRGGTCCTATT | 30 | x | x |
| 228 |     | PR_AS76_r1(30)_228_T | TCCAATTATGTTGRCAGGTGTRGGTCCTAC | 30 | x |   |
|     |     | PR_AS76_r2(30)_228_T | TCCAATTATGTTGRCAGGTGTRGGTCCTAT | 30 | x | x |
|     |     | PR_AS76_f3_228_A     | GGACATAARGYTATAGGTACAGTATT     | 26 |   | x |

|    |     |                       |                                |    |   |   |
|----|-----|-----------------------|--------------------------------|----|---|---|
|    |     | PR_AS76_f4_228_A      | GGACATAARGYTATAGGTACAGTAGT     | 26 |   | x |
|    |     | PR_AS76_f5_228_A      | GGACATAARGYTATAGGTACAGTGTT     | 26 |   | x |
|    |     | PR_AS76_f6_228_A      | GGACATAARGYTATAGGTACAGTGGT     | 26 |   | x |
|    |     | PR_AS76_f7_228_A      | GGACATAARGYTGTAGGTACAGTATT     | 26 |   | x |
|    |     | PR_AS76_f8_228_A      | GGACATAARGYTGTAGGTACAGTAGT     | 26 |   | x |
|    |     | PR_AS76_f9_228_A      | GGACATAARGYTGTAGGTACAGTGTT     | 26 |   | x |
|    |     | PR_AS76_f10_228_A     | GGACATAARGYTGTAGGTACAGTGGT     | 26 |   | x |
|    |     | PR_AS76_f11_228_A     | GGACATAARGYTGTAGGTACAGTATT     | 26 |   | x |
|    |     | PR_AS76_f12_228_A     | GGACATAARGYTGTAGGTACAGTAGT     | 26 |   | x |
|    |     | PR_AS76_f13_228_A     | GGACATAARAYTATAGGTACAGTGTT     | 26 |   | x |
|    |     | PR_AS76_f14_228_A     | GGACATAARAYTATAGGTACAGTGGT     | 26 |   | x |
|    |     | PR_AS76_f15_228_A     | GGACATAARAYTATAGGTACAGTATT     | 26 |   | x |
|    |     | PR_AS76_f16_228_A     | GGACATAARAYTATAGGTACAGTAGT     | 26 |   | x |
|    |     | PR_AS76_f17_228_A     | GGACATAARAYTGTAGGTACAGTGTT     | 26 |   | x |
|    |     | PR_AS76_f18_228_A     | GGACATAARAYTGTAGGTACAGTGGT     | 26 |   | x |
| 77 | 229 | PR_AS77_r_229_C       | GTTGACAGGTGTAGGTCCTA           | 20 | x | x |
|    |     | PR_AS77_r2_229_C      | GTTGRCAGGTGTGGGTCCTA           | 20 | x | x |
|    | 230 | PR_AS77_r_230_A       | TGTTGACAGGTGTAGGTCCT           | 20 | x | x |
|    |     | PR_AS77_r2_230_A      | TGTTGRCAGGTGTGGGTCCT           | 20 | x | x |
|    | 231 | PR_AS77_r_231_T       | ATGTTGACAGGTGTAGGTCC           | 20 | x | x |
|    |     | PR_AS77_r2_231_T      | ATGTTGGCAGGTGTGGGTC            | 20 | x | x |
|    |     | PR_AS77_r3_231_T      | ATGTTGACAGGTGTGGGTC            | 20 | x | x |
|    |     | PR_AS77_r4_231_T      | ATGTTGGCAGGTGTAGGTCC           | 20 | x | x |
| 82 | 244 | PR_AS82_f_244_G       | TATTAGTAGGACCTACACCT           | 20 | x | x |
|    |     | PR_AS82_f(29)_244_G   | TAGGTACAGTRTTARTAGGACCYACACCT  | 29 | x | x |
|    | 245 | PR_AS82_f_245_T       | ATTAGTAGGACCTACACCTG           | 20 | x | x |
|    |     | PR_AS82_f2_245_T      | RTTARTAGGACCCACACCTG           | 20 | x | x |
|    |     | PR_AS82_f2(30)_245_T  | TAGGTACAGTRTTARTAGGACCYACACCTG | 30 | x | x |
|    |     | PR_AS82_f3(30)_245_T  | TAGGTACAGTRTTARTAGGACCYACACCTA | 30 | x | x |
|    |     | PR_AS82_f4(30)_245_T  | TAGGTACAGTRTTARTAGGACCYACACCTT | 30 | x | x |
|    |     | PR_AS82_f5(30)_245_T  | TAGGTACAGTRTTARTAGGACCYACACCTC | 30 | x | x |
|    | 246 | PR_AS82_f_246_C       | TTAGTAGGACCTACACCTGT           | 20 | x | x |
|    |     | PR_AS82_f2_246_C      | TTARTAGGACCCACACCTGC           | 20 | x | x |
|    |     | PR_AS82_f3_246_C      | TTARTAGGACCTACACCTGC           | 20 | x | x |
|    |     | PR_AS82_f4_246_C      | TTARTAGGACCCACACCTGT           | 20 | x | x |
|    |     | PR_AS82_f2(30)_246_C  | AGGTACAGTRTTARTAGGACCYACACCTGT | 30 | x | x |
|    |     | PR_AS82_f3(30)_246_C  | AGGTACAGTRTTARTAGGACCYACACCTAT | 30 | x | x |
|    |     | PR_AS82_f4(30)_246_C  | AGGTACAGTRTTARTAGGACCYACACCTTT | 30 | x | x |
|    |     | PR_AS82_f5(30)_246_C  | AGGTACAGTRTTARTAGGACCYACACCTCT | 30 | x | x |
|    |     | PR_AS82_f6(30)_246_C  | AGGTACAGTRTTARTAGGACCYACACCTGC | 30 | x | x |
|    |     | PR_AS82_f7(30)_246_C  | AGGTACAGTRTTARTAGGACCYACACCTAC | 30 | x | x |
|    |     | PR_AS82_f8(30)_246_C  | AGGTACAGTRTTARTAGGACCYACACCTTC | 30 | x | x |
|    |     | PR_AS82_f9(30)_246_C  | AGGTACAGTRTTARTAGGACCYACACCTCC | 30 | x | x |
|    |     | PR_AS82_f10(30)_246_C | AGGTACAGTRTTARTAGGACCYACACCTGG | 30 | x | x |
|    |     | PR_AS82_f11(30)_246_C | AGGTACAGTRTTARTAGGACCYACACCTAG | 30 | x | x |
|    |     | PR_AS82_f12(30)_246_C | AGGTACAGTRTTARTAGGACCYACACCTTG | 30 | x | x |
|    |     | PR_AS82_f13(30)_246_C | AGGTACAGTRTTARTAGGACCYACACCTCG | 30 | x | x |
| 84 | 250 | PR_AS84_f_250_A       | TAGGACCTACACCTGTCAAC           | 20 | x | x |
|    |     | PR_AS84_f2_250_A      | TAGGACCYACACCTGCCAAC           | 20 | x | x |
|    | 251 | PR_AS84_f_251_T       | AGGACCTACACCTGTCAACA           | 20 | x | x |
|    |     | PR_AS84_f2_251_T      | AGGACCYACACCTGCCAAC            | 20 | x | x |
|    |     | PR_AS84_f2(25)_251_T  | TTARTAGGACCYACACCTGTCAACA      | 25 | x | x |
|    |     | PR_AS84_f3(25)_251_T  | TTARTAGGACCYACACCTGTCAACG      | 25 | x | x |
|    |     | PR_AS84_f4(25)_251_T  | TTARTAGGACCYACACCTGCCAAC       | 25 | x | x |
|    |     | PR_AS84_f5(25)_251_T  | TTARTAGGACCYACACCTGCCAACG      | 25 | x | x |
|    | 252 | PR_AS84_f_252_A       | GGACCTACACCTGTCAACAT           | 20 | x | x |
|    |     | PR_AS84_f2_252_A      | GGACCYACACCTGCCAACAT           | 20 | x | x |
|    |     | PR_AS84_f2(26)_252_A  | TTARTAGGACCYACACCTGTCAACAT     | 26 | x | x |
|    |     | PR_AS84_f3(26)_252_A  | TTARTAGGACCYACACCTGTCAACGT     | 26 | x | x |
|    |     | PR_AS84_f4(26)_252_A  | TTARTAGGACCYACACCTGCCAACAT     | 26 | x | x |
|    |     | PR_AS84_f5(26)_252_A  | TTARTAGGACCYACACCTGCCAACGT     | 26 | x | x |
| 88 | 262 | PR_AS88_f_262_A       | CTGTCAACATAATTGGAAGA           | 20 | x | x |
|    |     | PR_AS88_f2(30)_262_A  | GGACCYACACCTGYCAACATAATTGGAAGA | 30 | x | x |
|    | 263 | PR_AS88_f_263_A       | TGTCAACATAATTGGAAGAA           | 20 | x | x |
|    |     | PR_AS88_f2(30)_263_A  | GACCYACACCTGYCAACATAATTGGAAGAA | 30 | x | x |
|    |     | PR_AS88_f3(30)_263_A  | GACCYACACCTGYCAACATAATTGGAAGAG | 30 | x | x |
|    | 264 | PR_AS88_f_264_T       | GTCAACATAATTGGAAGAAA           | 20 | x |   |

|    |                      |                                |                                |    |   |   |
|----|----------------------|--------------------------------|--------------------------------|----|---|---|
|    | PR_AS88_f3(30)_264_T | ACCYACACCTGYCAACATAATTGGAAGAAA | 30                             | x  | x |   |
|    | PR_AS88_f4(30)_264_T | ACCYACACCTGYCAACATAATTGGAAGAAG | 30                             | x  | x |   |
|    | PR_AS88_f5(30)_264_T | ACCYACACCTGYCAACATAATTGGAAGAGA | 30                             | x  | x |   |
|    | PR_AS88_f6(30)_264_T | ACCYACACCTGYCAACATAATTGGAAGAGG | 30                             | x  | x |   |
| 90 | 268                  | PR_AS90_f_268_T                | ACATAATTGGAAGAAATCTG           | 20 | x | x |
|    |                      | PR_AS90_f(30)_268_T            | ACACCTGYCAACATAATTGGAAGAAATCTG | 30 | x | x |
|    |                      | PR_AS90_f2(30)_268_T           | ACACCTGYCAACATAATTGGAAGAAATATG | 30 | x | x |
|    |                      | PR_AS90_f3(30)_268_T           | ACACCTGYCAACATAATTGGAAGAAATTTG | 30 | x | x |
|    |                      | PR_AS90_f4(30)_268_T           | ACACCTGYCAACATAATTGGAAGAAACCTG | 30 | x | x |
|    |                      | PR_AS90_f5(30)_268_T           | ACACCTGYCAACATAATTGGAAGAAACATG | 30 | x | x |
|    |                      | PR_AS90_f6(30)_268_T           | ACACCTGYCAACATAATTGGAAGAAACTTG | 30 | x | x |
|    |                      | PR_AS90_r_268_A                | ACTGCAGCCAATCTGAGTCA           | 20 | x | x |
|    | 269                  | PR_AS90_f_269_T                | CATAATTGGAAGAAATCTGT           | 20 | x | x |
|    |                      | PR_AS90_f2(30)_269_T           | CACCTGYCAACATAATTGGAAGAAATATGT | 30 | x | x |
|    |                      | PR_AS90_f3(30)_269_T           | CACCTGYCAACATAATTGGAAGAAATTTGT | 30 | x | x |
|    |                      | PR_AS90_f4(30)_269_T           | CACCTGYCAACATAATTGGAAGAAACCTGT | 30 | x | x |
|    |                      | PR_AS90_f5(30)_269_T           | CACCTGYCAACATAATTGGAAGAAACATGT | 30 | x | x |
|    |                      | PR_AS90_f6(30)_269_T           | CACCTGYCAACATAATTGGAAGAAACTTGT | 30 | x | x |
|    |                      | PR_AS90_f7(30)_269_T           | CACCTGYCAACATAATTGGAAGAAATCTGA | 30 | x | x |
|    |                      | PR_AS90_f8(30)_269_T           | CACCTGYCAACATAATTGGAAGAAATATGA | 30 | x | x |
|    |                      | PR_AS90_f9(30)_269_T           | CACCTGYCAACATAATTGGAAGAAATTTGA | 30 | x | x |
|    |                      | PR_AS90_f10(30)_269_T          | CACCTGYCAACATAATTGGAAGAAACCTGA | 30 | x | x |
|    |                      | PR_AS90_f11(30)_269_T          | CACCTGYCAACATAATTGGAAGAAACATGA | 30 | x | x |
|    |                      | PR_AS90_f12(30)_269_T          | CACCTGYCAACATAATTGGAAGAAACTTGA | 30 | x | x |
|    |                      | PR_AS90_f(30)_269_T            | CACCTGYCAACATAATTGGAAGAAATCTGT | 30 | x | x |
|    |                      | PR_AS90_r_269_A                | AACCTGCAGCCAATCTGAGTC          | 20 | x | x |
|    | 270                  | PR_AS90_f_270_G                | ATAATTGGAAGAAATCTGTT           | 20 | x | x |
|    |                      | PR_AS90_f(30)_270_G            | ACCTGYCAACATAATTGGAAGAAATCTGTT | 30 | x | x |
|    |                      | PR_AS90_f2(30)_270_G           | ACCTGYCAACATAATTGGAAGAAATATGTT | 30 | x | x |
|    |                      | PR_AS90_f3(30)_270_G           | ACCTGYCAACATAATTGGAAGAAATTTGTT | 30 | x | x |
|    |                      | PR_AS90_f4(30)_270_G           | ACCTGYCAACATAATTGGAAGAAACCTGTT | 30 | x | x |
|    |                      | PR_AS90_f5(30)_270_G           | ACCTGYCAACATAATTGGAAGAAACATGTT | 30 | x | x |
|    |                      | PR_AS90_f6(30)_270_G           | ACCTGYCAACATAATTGGAAGAAACTTGT  | 30 | x | x |
|    |                      | PR_AS90_f7(30)_270_G           | ACCTGYCAACATAATTGGAAGAAATCTGAT | 30 | x | x |
|    |                      | PR_AS90_f8(30)_270_G           | ACCTGYCAACATAATTGGAAGAAATATGAT | 30 | x | x |
|    |                      | PR_AS90_f9(30)_270_G           | ACCTGYCAACATAATTGGAAGAAATTTGAT | 30 | x | x |
|    |                      | PR_AS90_f10(30)_270_G          | ACCTGYCAACATAATTGGAAGAAACCTGAT | 30 | x | x |
|    |                      | PR_AS90_f11(30)_270_G          | ACCTGYCAACATAATTGGAAGAAACATGAT | 30 | x | x |
|    |                      | PR_AS90_f12(30)_270_G          | ACCTGYCAACATAATTGGAAGAAACTTGT  | 30 | x | x |
|    |                      | PR_AS90_r_270_C                | AACTGCAGCCAATCTGAGT            | 20 | x | x |
| 93 | 277                  | PR_AS93_r1_277_T               | AAAATTTAAACTGCAGCCAA           | 20 | x | x |
|    |                      | PR_AS93_r1_278_A               | AAAATTTAAACTGCAGCCA            | 19 | x | x |
|    |                      | PR_AS93_r1_279_A               | AAAATTTAAACTGCAGCC             | 18 | x | x |
|    |                      | PR_AS93_f1_277_A               | GAAGAAATCTGTTGACTCAG           | 20 | x | x |
|    |                      | PR_AS93_f(30)_277_A            | AACATAATTGGAAGAAAYCTGTTGACTCAG | 30 | x | x |
|    |                      | PR_AS93_f2(30)_277_A           | AACATAATTGGAAGAAAYHTGTTGACTCAG | 30 | x | x |
|    |                      | PR_AS93_f2(30)_277_A           | AACATAATTGGAAGAAAYHTGTTGACTCAG | 30 | x | x |
|    |                      | PR_AS93_f3(30)_277_A           | AACATAATTGGAAGAAAYHTGTTGACTCAA | 30 | x | x |
|    |                      | PR_AS93_f4(30)_277_A           | AACATAATTGGAAGAAAYHTGATGACTCAG | 30 | x | x |
|    |                      | PR_AS93_f5(30)_277_A           | AACATAATTGGAAGAAAYHTGATGACTCAA | 30 | x | x |
|    |                      | PR_AS93_r2_277_T               | AATGGGAAAATTTARAGTGCAGCCAA     | 26 |   | x |
|    |                      | PR_AS93_r3_277_T               | AATGGGAAAATTTARAGTGAACCAA      | 26 |   | x |
|    |                      | PR_AS93_r4_277_T               | AATGGGAAAATTTARAGTACAGCCAA     | 26 |   | x |
|    |                      | PR_AS93_r5_277_T               | AATGGGAAAATTTARAGTACAACCAA     | 26 |   | x |
|    |                      | PR_AS93_r6_277_T               | AATGGGAAAATTTARGGTGCAGCCAA     | 26 |   | x |
|    |                      | PR_AS93_r7_277_T               | AATGGGAAAATTTARGGTGAACCAA      | 26 |   | x |
|    |                      | PR_AS93_r8_277_T               | AATGGGAAAATTTARGGTACAGCCAA     | 26 |   | x |
|    |                      | PR_AS93_r9_277_T               | AATGGGAAAATTTARGGTACAACCAA     | 26 |   | x |
|    | 278                  | PR_AS93_f1_278_T               | AAGAAATCTGTTGACTCAGA           | 20 | x | x |
|    |                      | PR_AS93_f(30)_278_T            | ACATAATTGGAAGAAAYCTGTTGACTCAGA | 30 | x | x |
|    |                      | PR_AS93_f2(30)_278_T           | ACATAATTGGAAGAAAYHTGTTGACTCAGA | 30 | x | x |
|    |                      | PR_AS93_f3(30)_278_T           | ACATAATTGGAAGAAAYHTGTTGACTCAA  | 30 | x | x |
|    |                      | PR_AS93_f4(30)_278_T           | ACATAATTGGAAGAAAYHTGATGACTCAGA | 30 | x | x |
|    |                      | PR_AS93_f5(30)_278_T           | ACATAATTGGAAGAAAYHTGATGACTCAA  | 30 | x | x |
|    |                      | PR_AS93_f6(30)_278_T           | ACATAATTGGAAGAAAYHTGTTGACTCAGC | 30 | x | x |
|    |                      | PR_AS93_f7(30)_278_T           | ACATAATTGGAAGAAAYHTGTTGACTCAAC | 30 | x | x |
|    |                      | PR_AS93_f8(30)_278_T           | ACATAATTGGAAGAAAYHTGATGACTCAGC | 30 | x | x |
|    |                      | PR_AS93_f9(30)_278_T           | ACATAATTGGAAGAAAYHTGATGACTCAAC | 30 | x | x |
|    | 279                  | PR_AS93_f1_279_T               | AGAAATCTGTTGACTCAGAT           | 20 | x | x |

|                      |                                |    |   |   |
|----------------------|--------------------------------|----|---|---|
| PR_AS93_f(30)_279_T  | CATAATTGGAAGAAAYCTGTTGACTCAGAT | 30 | x | x |
| PR_AS93_f2(30)_279_T | CATAATTGGAAGAAAYHTGTTGACTCAGAT | 30 | x | x |
| PR_AS93_f3(30)_279_T | CATAATTGGAAGAAAYHTGTTGACTCAAAT | 30 | x | x |
| PR_AS93_f4(30)_279_T | CATAATTGGAAGAAAYHTGATGACTCAGAT | 30 | x | x |
| PR_AS93_f5(30)_279_T | CATAATTGGAAGAAAYHTGATGACTCAAAT | 30 | x | x |
| PR_AS93_f6(30)_279_T | CATAATTGGAAGAAAYHTGTTGACTCAGCT | 30 | x | x |
| PR_AS93_f7(30)_279_T | CATAATTGGAAGAAAYHTGTTGACTCAACT | 30 | x | x |
| PR_AS93_f8(30)_279_T | CATAATTGGAAGAAAYHTGATGACTCAGCT | 30 | x | x |
| PR_AS93_f9(30)_279_T | CATAATTGGAAGAAAYHTGATGACTCAACT | 30 | x | x |

## Oligonucleotides for the HIV reverse transcriptase array

| position         |     | name                          | sequence 5'-3'                  | length                         |    |
|------------------|-----|-------------------------------|---------------------------------|--------------------------------|----|
| 41               | 121 | RT_AS41_f1_121_A              | ATAAAAGCATTARTAGAAATYTGACAGAA   | 30                             |    |
|                  | 122 | RT_AS41_f1_122_T              | TAAAAGCATTARTAGAAATYTGACAGAAA   | 30                             |    |
|                  |     | RT_AS41_f2_122_T              | TAAAAGCATTARTAGAAATYTGACAGAAC   | 30                             |    |
|                  |     | RT_AS41_f3_122_T              | TAAAAGCATTARTAGAAATYTGACAGAAT   | 30                             |    |
|                  | 123 | RT_AS41_f1_123_G              | AAAAGCATTARTAGAAATYTGACAGAAAT   | 30                             |    |
|                  |     | RT_AS41_f2_123_G              | AAAAGCATTARTAGAAATYTGACAGAACT   | 30                             |    |
| RT_AS41_f3_123_G |     | AAAAGCATTARTAGAAATYTGACAGAATT | 30                              |                                |    |
| 44               | 130 | RT_AS44_r1_130_C              | TTTCAGGCCCAATTTTTGAAATTTTYCCTT  | 30                             |    |
|                  |     | RT_AS44_r2_130_C              | TTTCAGGCCCAATTTTTGAAATTTTYCCAT  | 30                             |    |
|                  |     | RT_AS44_r3_130_C              | TTTCAGGCCCAATTTTTGAAATTTTYCCGT  | 30                             |    |
|                  |     | RT_AS44_r4_130_C              | TTTCAGGCCCAATTTTTGAAATTTTYCCTG  | 30                             |    |
|                  |     | RT_AS44_r5_130_C              | TTTCAGGCCCAATTTTTGAAATTTTYCCAG  | 30                             |    |
|                  |     | RT_AS44_r6_130_C              | TTTCAGGCCCAATTTTTGAAATTTTYCCGG  | 30                             |    |
|                  | 131 | RT_AS44_r1_131_T              | TTTTTCAGGCCCAATTTTTGAAATTTTTCCT | 30                             |    |
|                  |     | RT_AS44_r2_131_T              | TTTTTCAGGCCCAATTTTTGAAATTTTCCA  | 30                             |    |
|                  |     | RT_AS44_r3_131_T              | TTTTTCAGGCCCAATTTTTGAAATTTTCCG  | 30                             |    |
|                  |     | RT_AS44_r4_131_T              | TTTTTCAGGCCCAATTTTTGAAATTTTCCCT | 30                             |    |
|                  |     | RT_AS44_r5_131_T              | TTTTTCAGGCCCAATTTTTGAAATTTTCCCA | 30                             |    |
|                  |     | RT_AS44_r6_131_T              | TTTTTCAGGCCCAATTTTTGAAATTTTCCCG | 30                             |    |
|                  | 132 | RT_AS44_r1_132_T              | ATTTTCAGGCCCAATTTTTGAAATTTTCC   | 30                             |    |
|                  |     | RT_AS44_r2_132_T              | ATTTTCAGGCCCAATTTTTGAAATTTTCCC  | 30                             |    |
|                  | 62  | 184                           | RT_AS62_f1_184_G                | CCTGAAAATCCATAYAATACTCCAGTATTT | 30 |
|                  |     | 185                           | RT_AS62_f1_185_C                | CTGAAAATCCATAYAATACTCCAGTATTTG | 30 |
|                  |     | 186                           | RT_AS62_f1_186_C                | TGAAAATCCATAYAATACTCCAGTATTTGC | 30 |
|                  |     |                               | RT_AS62_f2_186_C                | TGAAAATCCATAYAATACTCCAGTATTTGT | 30 |
| 65               | 193 | RT_AS65_f1_193_A              | CCATAYAATACTCCAGTATTTGYCATAAAG  | 30                             |    |
|                  |     | RT_AS65_f2_193_A              | CCATAYAATACTCCAGTATTTGYTATAAAG  | 30                             |    |
|                  | 194 | RT_AS65_f1_194_A              | CATAYAATACTCCAGTATTTGYCATAAAGA  | 30                             |    |
|                  |     | RT_AS65_f2_194_A              | CATAYAATACTCCAGTATTTGYTATAAAGG  | 30                             |    |
|                  | 195 | RT_AS65_f1_195_A              | ATAYAATACTCCAGTATTTGYCATAAAGAA  | 30                             |    |
|                  |     | RT_AS65_f2_195_A              | ATAYAATACTCCAGTATTTGYTATAAAGAA  | 30                             |    |
|                  |     | RT_AS65_f3_195_A              | ATAYAATACTCCAGTATTTGYCATAAAGGA  | 30                             |    |
|                  |     | RT_AS65_f4_195_A              | ATAYAATACTCCAGTATTTGYTATAAAGGA  | 30                             |    |
|                  |     | RT_AS65_f5_195_A              | ATAYAATACTCCAGTATTTGYCATAAAGAG  | 30                             |    |
|                  |     | RT_AS65_f6_195_A              | ATAYAATACTCCAGTATTTGYTATAAAGAG  | 30                             |    |
|                  |     | RT_AS65_f7_195_A              | ATAYAATACTCCAGTATTTGYCATAAAGGG  | 30                             |    |
|                  |     | RT_AS65_f8_195_A              | ATAYAATACTCCAGTATTTGYTATAAAGGG  | 30                             |    |

|    |     |                   |                                |    |
|----|-----|-------------------|--------------------------------|----|
| 67 | 199 | RT_AS67_f1_199_G  | AATACTCCAGTATTTGYYATAAAGAAAAAA | 30 |
|    |     | RT_AS67_f1_201_C  | TACTCCAGTATTTGYYATAAAGRAAAAAGA | 30 |
|    |     | RT_AS67_r1_199_C  | TAATTTTCTCCATYTAITACTGT        | 23 |
|    |     | RT_AS67_r2_199_C  | TAATTTTCTCCATYTAITACTGC        | 23 |
|    |     | RT_AS67_r3_199_C  | TAATTTTCTCCATYTAITACTTT        | 23 |
|    |     | RT_AS67_r4_199_C  | TAATTTTCTCCATYTAITACTTC        | 23 |
|    |     | RT_AS67_r5_199_C  | TAATTTTCTCCATYTAITACTCT        | 23 |
|    |     | RT_AS67_r6_199_C  | TAATTTTCTCCATYTAITACTCC        | 23 |
|    |     | RT_AS67_r7_199_C  | TAATTTTCTCCATYTAICTACTGT       | 23 |
|    |     | RT_AS67_r8_199_C  | TAATTTTCTCCATYTAICTACTGC       | 23 |
|    |     | RT_AS67_r9_199_C  | TAATTTTCTCCATYTAICTACTTT       | 23 |
|    |     | RT_AS67_r10_199_C | TAATTTTCTCCATYTAICTACTTC       | 23 |
|    |     | RT_AS67_r11_199_C | TAATTTTCTCCATYTAICTACTCT       | 23 |
|    |     | RT_AS67_r12_199_C | TAATTTTCTCCATYTAICTACTCC       | 23 |
|    | 200 | RT_AS67_f1_200_A  | ATACTCCAGTATTTGYYATAAAGRAAAAAG | 30 |
|    |     | RT_AS67_r1_200_T  | TAATTTTCTCCATYTAITACTG         | 22 |
|    |     | RT_AS67_r2_200_T  | TAATTTTCTCCATYTAITACTT         | 22 |
|    | 201 | RT_AS67_r1_201_G  | TAHTTTTCTCCATTTAGTACT          | 21 |
|    |     | RT_AS67_r2_201_G  | TAHTTTTCTCCATTTAGCACT          | 21 |
|    |     | RT_AS67_r3_201_G  | TAHTTTTCTCCATTTATTACT          | 21 |
|    |     | RT_AS67_r4_201_G  | TAHTTTTCTCCATTTATCACT          | 21 |
|    |     | RT_AS67_r5_201_G  | TAHTTTTCTCCATTTACTACT          | 21 |
|    |     | RT_AS67_r6_201_G  | TAHTTTTCTCCATTTACCACT          | 21 |
|    |     | RT_AS67_r7_201_G  | TAHTTTTCTCCATTTAATACT          | 21 |
|    |     | RT_AS67_r8_201_G  | TAHTTTTCTCCATTTAACACT          | 21 |
|    |     | RT_AS67_r9_201_G  | TAHTTTTCTCCATCTAGTACT          | 21 |
|    |     | RT_AS67_r10_201_G | TAHTTTTCTCCATCTAGCACT          | 21 |
|    |     | RT_AS67_r11_201_G | TAHTTTTCTCCATCTATTACT          | 21 |
|    |     | RT_AS67_r12_201_G | TAHTTTTCTCCATCTATCACT          | 21 |
|    |     | RT_AS67_r13_201_G | TAHTTTTCTCCATCTACTACT          | 21 |
|    |     | RT_AS67_r14_201_G | TAHTTTTCTCCATCTACCACT          | 21 |
|    |     | RT_AS67_r15_201_G | TAHTTTTCTCCATCTAATACT          | 21 |
|    |     | RT_AS67_r16_201_G | TAHTTTTCTCCATCTAACACT          | 21 |
| 69 | 205 | RT_AS69_r1_205_T  | ATCYAYTAITTTTCTCCATTTAG        | 23 |
|    |     | RT_AS69_r2_205_T  | ATCYAYTAITTTTCTCCATTTAT        | 23 |
|    |     | RT_AS69_r3_205_T  | ATCYAYTAITTTTCTCCATTTAC        | 23 |
|    |     | RT_AS69_r4_205_T  | ATCYAYTAITTTTCTCCATTTAA        | 23 |
|    |     | RT_AS69_r5_205_T  | ATCYAYTAITTTTCTCCATCTAG        | 23 |
|    |     | RT_AS69_r6_205_T  | ATCYAYTAITTTTCTCCATCTAT        | 23 |
|    |     | RT_AS69_r7_205_T  | ATCYAYTAITTTTCTCCATCTAC        | 23 |
|    |     | RT_AS69_r8_205_T  | ATCYAYTAITTTTCTCCATCTAA        | 23 |
|    |     | RT_AS69_r9_205_T  | ATCYGYTAITTTTCTCCATTTAG        | 23 |
|    |     | RT_AS69_r10_205_T | ATCYGYTAITTTTCTCCATTTAT        | 23 |
|    |     | RT_AS69_r11_205_T | ATCYGYTAITTTTCTCCATTTAC        | 23 |
|    |     | RT_AS69_r12_205_T | ATCYGYTAITTTTCTCCATTTAA        | 23 |
|    |     | RT_AS69_r13_205_T | ATCYGYTAITTTTCTCCATCTAG        | 23 |
|    |     | RT_AS69_r14_205_T | ATCYGYTAITTTTCTCCATCTAT        | 23 |
|    |     | RT_AS69_r15_205_T | ATCYGYTAITTTTCTCCATCTAC        | 23 |
|    |     | RT_AS69_r16_205_T | ATCYGYTAITTTTCTCCATCTAA        | 23 |
|    | 206 | RT_AS69_r1_206_G  | TCTCTGARATCYACTAITTTTCTCCATTTA | 30 |
|    |     | RT_AS69_r2_206_G  | TCTCTGARATCYACTAITTTTCTCCATCTA | 30 |
|    |     | RT_AS69_r3_206_G  | TCTCTGARATCYATTAITTTTCTCCATTTA | 30 |
|    |     | RT_AS69_r4_206_G  | TCTCTGARATCYATTAITTTTCTCCATCTA | 30 |
|    |     | RT_AS69_r5_206_G  | TCTCTGARATCYGCTAITTTTCTCCATTTA | 30 |
|    |     | RT_AS69_r6_206_G  | TCTCTGARATCYGCTAITTTTCTCCATCTA | 30 |
|    |     | RT_AS69_r7_206_G  | TCTCTGARATCYGTTAITTTTCTCCATTTA | 30 |

|     |     |                   |                                 |    |
|-----|-----|-------------------|---------------------------------|----|
|     |     | RT_AS69_r8_206_G  | TCTCTGARATCYGTTAITTTTCTCCATCTA  | 30 |
| 207 |     | RT_AS69_r1_207_A  | TTCTCTGARATCYACTAITTTTCTCCATTT  | 30 |
|     |     | RT_AS69_r2_207_A  | TTCTCTGARATCYACTAITTTTCTCCATCT  | 30 |
|     |     | RT_AS69_r3_207_A  | TTCTCTGARATCYATTAITTTTCTCCATTT  | 30 |
|     |     | RT_AS69_r4_207_A  | TTCTCTGARATCYATTAITTTTCTCCATCT  | 30 |
|     |     | RT_AS69_r5_207_A  | TTCTCTGARATCYGCTAITTTTCTCCATTT  | 30 |
|     |     | RT_AS69_r6_207_A  | TTCTCTGARATCYGCTAITTTTCTCCATCT  | 30 |
|     |     | RT_AS69_r7_207_A  | TTCTCTGARATCYGTTAITTTTCTCCATTT  | 30 |
|     |     | RT_AS69_r8_207_A  | TTCTCTGARATCYGTTAITTTTCTCCATCT  | 30 |
| 70  | 208 | RT_AS70_r1_208_T  | GTTCTCTGARATCYACTAATTTTCTCCATT  | 30 |
|     |     | RT_AS70_r2_208_T  | GTTCTCTGARATCYACTAATTTTCTCCATC  | 30 |
|     |     | RT_AS70_r3_208_T  | GTTCTCTGARATCYACTACTTTTCTCCATT  | 30 |
|     |     | RT_AS70_r4_208_T  | GTTCTCTGARATCYACTACTTTTCTCCATC  | 30 |
|     |     | RT_AS70_r5_208_T  | GTTCTCTGARATCYACTATTTTTCTCCATT  | 30 |
|     |     | RT_AS70_r6_208_T  | GTTCTCTGARATCYACTATTTTTCTCCATC  | 30 |
|     |     | RT_AS70_r7_208_T  | GTTCTCTGARATCYATTAATTTTTCTCCATT | 30 |
|     |     | RT_AS70_r8_208_T  | GTTCTCTGARATCYATTAATTTTTCTCCATC | 30 |
|     |     | RT_AS70_r9_208_T  | GTTCTCTGARATCYATTACTTTTCTCCATT  | 30 |
|     |     | RT_AS70_r10_208_T | GTTCTCTGARATCYATTACTTTTCTCCATC  | 30 |
|     |     | RT_AS70_r11_208_T | GTTCTCTGARATCYATTATTTTTCTCCATT  | 30 |
|     |     | RT_AS70_r12_208_T | GTTCTCTGARATCYATTATTTTTCTCCATC  | 30 |
|     |     | RT_AS70_r13_208_T | GTTCTCTGARATCYGCTAATTTTTCTCCATT | 30 |
|     |     | RT_AS70_r14_208_T | GTTCTCTGARATCYGCTAATTTTTCTCCATC | 30 |
|     |     | RT_AS70_r15_208_T | GTTCTCTGARATCYGCTACTTTTCTCCATT  | 30 |
|     |     | RT_AS70_r16_208_T | GTTCTCTGARATCYGCTACTTTTCTCCATC  | 30 |
|     |     | RT_AS70_r17_208_T | GTTCTCTGARATCYGCTATTTTTCTCCATT  | 30 |
|     |     | RT_AS70_r18_208_T | GTTCTCTGARATCYGCTATTTTTCTCCATC  | 30 |
|     |     | RT_AS70_r19_208_T | GTTCTCTGARATCYGTTAATTTTTCTCCATT | 30 |
|     |     | RT_AS70_r20_208_T | GTTCTCTGARATCYGTTAATTTTTCTCCATC | 30 |
|     |     | RT_AS70_r21_208_T | GTTCTCTGARATCYGTTACTTTTCTCCATT  | 30 |
|     |     | RT_AS70_r22_208_T | GTTCTCTGARATCYGTTACTTTTCTCCATC  | 30 |
|     |     | RT_AS70_r23_208_T | GTTCTCTGARATCYGTTATTTTTCTCCATT  | 30 |
|     |     | RT_AS70_r24_208_T | GTTCTCTGARATCYGTTATTTTTCTCCATC  | 30 |
|     | 209 | RT_AS70_r1_209_T  | AGTTCTCTGARATCYACTAATTTTTCTCCAT | 30 |
|     |     | RT_AS70_r2_209_T  | AGTTCTCTGARATCYACTACTTTTCTCCAT  | 30 |
|     |     | RT_AS70_r3_209_T  | AGTTCTCTGARATCYACTATTTTTCTCCAT  | 30 |
|     |     | RT_AS70_r4_209_T  | AGTTCTCTGARATCYATTAATTTTTCTCCAT | 30 |
|     |     | RT_AS70_r5_209_T  | AGTTCTCTGARATCYATTACTTTTCTCCAT  | 30 |
|     |     | RT_AS70_r6_209_T  | AGTTCTCTGARATCYATTATTTTTCTCCAT  | 30 |
|     |     | RT_AS70_r7_209_T  | AGTTCTCTGARATCYGCTAATTTTTCTCCAT | 30 |
|     |     | RT_AS70_r8_209_T  | AGTTCTCTGARATCYGCTACTTTTCTCCAT  | 30 |
|     |     | RT_AS70_r9_209_T  | AGTTCTCTGARATCYGCTATTTTTCTCCAT  | 30 |
|     |     | RT_AS70_r10_209_T | AGTTCTCTGARATCYGTTAATTTTTCTCCAT | 30 |
|     |     | RT_AS70_r11_209_T | AGTTCTCTGARATCYGTTACTTTTCTCCAT  | 30 |
|     |     | RT_AS70_r12_209_T | AGTTCTCTGARATCYGTTATTTTTCTCCAT  | 30 |
|     | 210 | RT_AS70_r1_210_T  | AAGTTCTCTGARATCYACTAATTTTTCTCCA | 30 |
|     |     | RT_AS70_r2_210_T  | AAGTTCTCTGARATCYACTACTTTTCTCCA  | 30 |
|     |     | RT_AS70_r3_210_T  | AAGTTCTCTGARATCYACTATTTTTCTCCA  | 30 |
|     |     | RT_AS70_r4_210_T  | AAGTTCTCTGARATCYATTAATTTTTCTCCA | 30 |
|     |     | RT_AS70_r5_210_T  | AAGTTCTCTGARATCYATTACTTTTCTCCA  | 30 |
|     |     | RT_AS70_r6_210_T  | AAGTTCTCTGARATCYATTATTTTTCTCCA  | 30 |
|     |     | RT_AS70_r7_210_T  | AAGTTCTCTGARATCYGCTAATTTTTCTCCA | 30 |
|     |     | RT_AS70_r8_210_T  | AAGTTCTCTGARATCYGCTACTTTTCTCCA  | 30 |
|     |     | RT_AS70_r9_210_T  | AAGTTCTCTGARATCYGCTATTTTTCTCCA  | 30 |
|     |     | RT_AS70_r10_210_T | AAGTTCTCTGARATCYGTTAATTTTTCTCCA | 30 |
|     |     | RT_AS70_r11_210_T | AAGTTCTCTGARATCYGTTACTTTTCTCCA  | 30 |

|    |     |                   |                                |    |
|----|-----|-------------------|--------------------------------|----|
|    |     | RT_AS70_r12_210_T | AAGTTCTCTGARATCYGTTATTTTTCTCCA | 30 |
| 74 | 220 | RT_AS74_r1_220_A  | TTATTAAGTTCTCTGARATCTACTA      | 25 |
|    |     | RT_AS74_r2_220_A  | TTATTAAGTTCTCTGARATCTATTA      | 25 |
|    |     | RT_AS74_r3_220_A  | TTATTAAGTTCTCTGARATCTGCTA      | 25 |
|    |     | RT_AS74_r4_220_A  | TTATTAAGTTCTCTGARATCTGTTA      | 25 |
|    |     | RT_AS74_r5_220_A  | TTATTAAGTTCTCTGARATCCACTA      | 25 |
|    |     | RT_AS74_r6_220_A  | TTATTAAGTTCTCTGARATCCATTA      | 25 |
|    |     | RT_AS74_r7_220_A  | TTATTAAGTTCTCTGARATCCGCTA      | 25 |
|    |     | RT_AS74_r8_220_A  | TTATTAAGTTCTCTGARATCCGTTA      | 25 |
|    | 221 | RT_AS74_r1_221_A  | TYTTATTAAGTTCTCTGARATCTACT     | 26 |
|    |     | RT_AS74_r2_221_A  | TYTTATTAAGTTCTCTGARATCTATT     | 26 |
|    |     | RT_AS74_r3_221_A  | TYTTATTAAGTTCTCTGARATCTGCT     | 26 |
|    |     | RT_AS74_r4_221_A  | TYTTATTAAGTTCTCTGARATCTGTT     | 26 |
|    |     | RT_AS74_r5_221_A  | TYTTATTAAGTTCTCTGARATCCACT     | 26 |
|    |     | RT_AS74_r6_221_A  | TYTTATTAAGTTCTCTGARATCCATT     | 26 |
|    |     | RT_AS74_r7_221_A  | TYTTATTAAGTTCTCTGARATCCGCT     | 26 |
|    |     | RT_AS74_r8_221_A  | TYTTATTAAGTTCTCTGARATCCGTT     | 26 |
|    | 222 | RT_AS74_r1_222_T  | TYTTATTAAGTTCTCTGARATCTAC      | 25 |
|    |     | RT_AS74_r2_222_T  | TYTTATTAAGTTCTCTGARATCTAT      | 25 |
|    |     | RT_AS74_r3_222_T  | TYTTATTAAGTTCTCTGARATCTGC      | 25 |
|    |     | RT_AS74_r4_222_T  | TYTTATTAAGTTCTCTGARATCTGT      | 25 |
|    |     | RT_AS74_r5_222_T  | TYTTATTAAGTTCTCTGARATCCAC      | 25 |
|    |     | RT_AS74_r6_222_T  | TYTTATTAAGTTCTCTGARATCCAT      | 25 |
|    |     | RT_AS74_r7_222_T  | TYTTATTAAGTTCTCTGARATCCGC      | 25 |
|    |     | RT_AS74_r8_222_T  | TYTTATTAAGTTCTCTGARATCCGT      | 25 |
| 75 | 223 | RT_AS75_r1_223_C  | GAGTTYTYTTATTAAGTTCTCTGAAATCTA | 30 |
|    |     | RT_AS75_r2_223_C  | GAGTTYTYTTATTAAGTTCTCTGAAATCTG | 30 |
|    |     | RT_AS75_r3_223_C  | GAGTTYTYTTATTAAGTTCTCTGAAATCCA | 30 |
|    |     | RT_AS75_r4_223_C  | GAGTTYTYTTATTAAGTTCTCTGAAATCCG | 30 |
|    |     | RT_AS75_r5_223_C  | GAGTTYTYTTATTAAGTTCTCTGAGATCTA | 30 |
|    |     | RT_AS75_r6_223_C  | GAGTTYTYTTATTAAGTTCTCTGAGATCTG | 30 |
|    |     | RT_AS75_r7_223_C  | GAGTTYTYTTATTAAGTTCTCTGAGATCCA | 30 |
|    |     | RT_AS75_r8_223_C  | GAGTTYTYTTATTAAGTTCTCTGAGATCCG | 30 |
|    | 224 | RT_AS75_r1_224_A  | TGAGTTYTYTTATTAAGTTCTCTGAAATCT | 30 |
|    |     | RT_AS75_r2_224_A  | TGAGTTYTYTTATTAAGTTCTCTGAAATCC | 30 |
|    |     | RT_AS75_r3_224_A  | TGAGTTYTYTTATTAAGTTCTCTGAGATCT | 30 |
|    |     | RT_AS75_r4_224_A  | TGAGTTYTYTTATTAAGTTCTCTGAGATCC | 30 |
|    | 225 | RT_AS75_r1_225_T  | TTGAGTTYTYTTATTAAGTTCTCTGAAATC | 30 |
|    |     | RT_AS75_r2_225_T  | TTGAGTTYTYTTATTAAGTTCTCTGAGATC | 30 |
| 77 | 229 | RT_AS77_r1_229_A  | TCTTGAGTTYTYTTATTAAGTTCTCTGA   | 28 |
|    | 230 | RT_AS77_r1_230_A  | TCTTGAGTTYTYTTATTAAGTTCTCTG    | 27 |
|    | 231 | RT_AS77_r1_231_G  | TCTTGAGTTYTYTTATTAAGTTCTCT     | 26 |
| 98 | 292 | RT_AS98_f1_292_G  | TGGGAAGTTCAATTAGGAATACCACATCCT | 30 |
|    | 293 | RT_AS98_f1_293_C  | GGGAAGTTCAATTAGGAATACCACATCCTG | 30 |
|    |     | RT_AS98_f2_293_C  | GGGAAGTTCAATTAGGAATACCACATCCTT | 30 |
|    |     | RT_AS98_f3_293_C  | GGGAAGTTCAATTAGGAATACCACATCCCG | 30 |
|    |     | RT_AS98_f4_293_C  | GGGAAGTTCAATTAGGAATACCACATCCCT | 30 |
|    | 294 | RT_AS98_f1_294_A  | GGAAGTTCAATTAGGAATACCACATCCTGC | 30 |
|    |     | RT_AS98_f2_294_A  | GGAAGTTCAATTAGGAATACCACATCCTTC | 30 |
|    |     | RT_AS98_f3_294_A  | GGAAGTTCAATTAGGAATACCACATCCCGC | 30 |
|    |     | RT_AS98_f4_294_A  | GGAAGTTCAATTAGGAATACCACATCCCTC | 30 |
|    |     | RT_AS98_f5_294_A  | GGAAGTTCAATTAGGAATACCACATCCTGG | 30 |
|    |     | RT_AS98_f6_294_A  | GGAAGTTCAATTAGGAATACCACATCCTTG | 30 |

|     |     |                    |                                |    |
|-----|-----|--------------------|--------------------------------|----|
|     |     | RT_AS98_f7_294_A   | GGAAGTTCAATTAGGAATACCACATCCCGG | 30 |
|     |     | RT_AS98_f8_294_A   | GGAAGTTCAATTAGGAATACCACATCCCTG | 30 |
| 100 | 298 | RT_AS100_f1_298_T  | GTTCAATTAGGAATACCACATCCYGCAGGG | 30 |
|     |     | RT_AS100_f2_298_T  | GTTCAATTAGGAATACCACATCCYGGAGGG | 30 |
|     |     | RT_AS100_f3_298_T  | GTTCAATTAGGAATACCACATCCYTCAGGG | 30 |
|     |     | RT_AS100_f4_298_T  | GTTCAATTAGGAATACCACATCCYTGAGGG | 30 |
|     | 299 | RT_AS100_f1_299_T  | TTCAATTAGGAATACCACATCCYGCAGGGT | 30 |
|     |     | RT_AS100_f2_299_T  | TTCAATTAGGAATACCACATCCYGGAGGGT | 30 |
|     |     | RT_AS100_f3_299_T  | TTCAATTAGGAATACCACATCCYTCAGGGT | 30 |
|     |     | RT_AS100_f4_299_T  | TTCAATTAGGAATACCACATCCYTGAGGGT | 30 |
|     |     | RT_AS100_f5_299_T  | TTCAATTAGGAATACCACATCCYGCAGGGA | 30 |
|     |     | RT_AS100_f6_299_T  | TTCAATTAGGAATACCACATCCYGGAGGGA | 30 |
|     |     | RT_AS100_f7_299_T  | TTCAATTAGGAATACCACATCCYTCAGGGA | 30 |
|     |     | RT_AS100_f8_299_T  | TTCAATTAGGAATACCACATCCYTGAGGGA | 30 |
|     | 300 | RT_AS100_f1_300_A  | TCAATTAGGAATACCACATCCYGCAGGGTT | 30 |
|     |     | RT_AS100_f2_300_A  | TCAATTAGGAATACCACATCCYGGAGGGTT | 30 |
|     |     | RT_AS100_f3_300_A  | TCAATTAGGAATACCACATCCYTCAGGGTT | 30 |
|     |     | RT_AS100_f4_300_A  | TCAATTAGGAATACCACATCCYTGAGGGTT | 30 |
|     |     | RT_AS100_f5_300_A  | TCAATTAGGAATACCACATCCYGCAGGGAT | 30 |
|     |     | RT_AS100_f6_300_A  | TCAATTAGGAATACCACATCCYGGAGGGAT | 30 |
|     |     | RT_AS100_f7_300_A  | TCAATTAGGAATACCACATCCYTCAGGGAT | 30 |
|     |     | RT_AS100_f8_300_A  | TCAATTAGGAATACCACATCCYTGAGGGAT | 30 |
| 101 | 301 | RT_AS101_f1_301_A  | CAATTAGGAATACCACATCCYKCAGGGTTA | 30 |
|     |     | RT_AS101_f2_301_A  | CAATTAGGAATACCACATCCYKCAGGGATA | 30 |
|     |     | RT_AS101_f3_301_A  | CAATTAGGAATACCACATCCYKGAGGGTTA | 30 |
|     |     | RT_AS101_f4_301_A  | CAATTAGGAATACCACATCCYKGAGGGATA | 30 |
|     | 302 | RT_AS101_f1_302_A  | AATTAGGAATACCACATCCYKCAGGGTTAA | 30 |
|     |     | RT_AS101_f2_302_A  | AATTAGGAATACCACATCCYKCAGGGATAA | 30 |
|     |     | RT_AS101_f3_302_A  | AATTAGGAATACCACATCCYKGAGGGTTAA | 30 |
|     |     | RT_AS101_f4_302_A  | AATTAGGAATACCACATCCYKGAGGGATAA | 30 |
|     |     | RT_AS101_f5_302_A  | AATTAGGAATACCACATCCYKCAGGGTTAG | 30 |
|     |     | RT_AS101_f6_302_A  | AATTAGGAATACCACATCCYKCAGGGATAG | 30 |
|     |     | RT_AS101_f7_302_A  | AATTAGGAATACCACATCCYKGAGGGTTAG | 30 |
|     |     | RT_AS101_f8_302_A  | AATTAGGAATACCACATCCYKGAGGGATAG | 30 |
|     |     | RT_AS101_f9_302_A  | AATTAGGAATACCACATCCYKCAGGGTTAC | 30 |
|     |     | RT_AS101_f10_302_A | AATTAGGAATACCACATCCYKCAGGGATAC | 30 |
|     |     | RT_AS101_f11_302_A | AATTAGGAATACCACATCCYKGAGGGTTAC | 30 |
|     |     | RT_AS101_f12_302_A | AATTAGGAATACCACATCCYKGAGGGATAC | 30 |
|     | 303 | RT_AS101_f1_303_A  | ATTAGGAATACCACATCCYKCAGGGTTAAA | 30 |
|     |     | RT_AS101_f2_303_A  | ATTAGGAATACCACATCCYKCAGGGATAAA | 30 |
|     |     | RT_AS101_f3_303_A  | ATTAGGAATACCACATCCYKGAGGGTTAAA | 30 |
|     |     | RT_AS101_f4_303_A  | ATTAGGAATACCACATCCYKGAGGGATAAA | 30 |
|     |     | RT_AS101_f5_303_A  | ATTAGGAATACCACATCCYKCAGGGTTAGA | 30 |
|     |     | RT_AS101_f6_303_A  | ATTAGGAATACCACATCCYKCAGGGATAGA | 30 |
|     |     | RT_AS101_f7_303_A  | ATTAGGAATACCACATCCYKGAGGGTTAGA | 30 |
|     |     | RT_AS101_f8_303_A  | ATTAGGAATACCACATCCYKGAGGGATAGA | 30 |
|     |     | RT_AS101_f9_303_A  | ATTAGGAATACCACATCCYKCAGGGTTACA | 30 |
|     |     | RT_AS101_f10_303_A | ATTAGGAATACCACATCCYKCAGGGATACA | 30 |
|     |     | RT_AS101_f11_303_A | ATTAGGAATACCACATCCYKGAGGGTTACA | 30 |
|     |     | RT_AS101_f12_303_A | ATTAGGAATACCACATCCYKGAGGGATACA | 30 |
|     |     | RT_AS101_f13_303_A | ATTAGGAATACCACATCCYKCAGGGTTAAC | 30 |
|     |     | RT_AS101_f14_303_A | ATTAGGAATACCACATCCYKCAGGGATAAC | 30 |
|     |     | RT_AS101_f15_303_A | ATTAGGAATACCACATCCYKGAGGGTTAAC | 30 |
|     |     | RT_AS101_f16_303_A | ATTAGGAATACCACATCCYKGAGGGATAAC | 30 |
|     |     | RT_AS101_f17_303_A | ATTAGGAATACCACATCCYKCAGGGTTAGC | 30 |

|     |     |                    |                                 |    |
|-----|-----|--------------------|---------------------------------|----|
|     |     | RT_AS101_f18_303_A | ATTAGGAATACCACATCCYKCAGGGATAGC  | 30 |
|     |     | RT_AS101_f19_303_A | ATTAGGAATACCACATCCYKGAGGGTTAGC  | 30 |
|     |     | RT_AS101_f20_303_A | ATTAGGAATACCACATCCYKGAGGGATAGC  | 30 |
|     |     | RT_AS101_f21_303_A | ATTAGGAATACCACATCCYKCAGGGTTACC  | 30 |
|     |     | RT_AS101_f22_303_A | ATTAGGAATACCACATCCYKCAGGGATAACC | 30 |
|     |     | RT_AS101_f23_303_A | ATTAGGAATACCACATCCYKGAGGGTTACC  | 30 |
|     |     | RT_AS101_f24_303_A | ATTAGGAATACCACATCCYKGAGGGATAACC | 30 |
|     |     | RT_AS101_f25_303_A | ATTAGGAATACCACATCCYKCAGGGTTAAG  | 30 |
|     |     | RT_AS101_f26_303_A | ATTAGGAATACCACATCCYKCAGGGATAAG  | 30 |
|     |     | RT_AS101_f27_303_A | ATTAGGAATACCACATCCYKGAGGGTTAAG  | 30 |
|     |     | RT_AS101_f28_303_A | ATTAGGAATACCACATCCYKGAGGGATAAG  | 30 |
|     |     | RT_AS101_f29_303_A | ATTAGGAATACCACATCCYKCAGGGTTAGG  | 30 |
|     |     | RT_AS101_f30_303_A | ATTAGGAATACCACATCCYKCAGGGATAGG  | 30 |
|     |     | RT_AS101_f31_303_A | ATTAGGAATACCACATCCYKGAGGGTTAGG  | 30 |
|     |     | RT_AS101_f32_303_A | ATTAGGAATACCACATCCYKGAGGGATAGG  | 30 |
|     |     | RT_AS101_f33_303_A | ATTAGGAATACCACATCCYKCAGGGTTACG  | 30 |
|     |     | RT_AS101_f34_303_A | ATTAGGAATACCACATCCYKCAGGGATAACG | 30 |
|     |     | RT_AS101_f35_303_A | ATTAGGAATACCACATCCYKGAGGGTTACG  | 30 |
|     |     | RT_AS101_f36_303_A | ATTAGGAATACCACATCCYKGAGGGATAACG | 30 |
| 103 | 307 | RT_AS103_r1_307_T  | CCCACATCCAGTACTGTYAYTGATTTTTT   | 28 |
|     |     | RT_AS103_r2_307_T  | CCCACATCCAGTACTGTYAYTGATTTTC    | 28 |
|     |     | RT_AS103_r3_307_T  | CCCACATCCAGTACTGTYAYTGATTTTG    | 28 |
|     |     | RT_AS103_r4_307_T  | CCCACATCCAGTACTGTYAYTGATTTGT    | 28 |
|     |     | RT_AS103_r5_307_T  | CCCACATCCAGTACTGTYAYTGATTTGC    | 28 |
|     |     | RT_AS103_r6_307_T  | CCCACATCCAGTACTGTYAYTGATTTGG    | 28 |
|     |     | RT_AS103_r7_307_T  | CCCACATCCAGTACTGTYAYTGATTTAT    | 28 |
|     |     | RT_AS103_r8_307_T  | CCCACATCCAGTACTGTYAYTGATTTAC    | 28 |
|     |     | RT_AS103_r9_307_T  | CCCACATCCAGTACTGTYAYTGATTTAG    | 28 |
|     |     | RT_AS103_r10_307_T | CCCACATCCAGTACTGTYGYTGATTTTTT   | 28 |
|     |     | RT_AS103_r11_307_T | CCCACATCCAGTACTGTYGYTGATTTTC    | 28 |
|     |     | RT_AS103_r12_307_T | CCCACATCCAGTACTGTYGYTGATTTTG    | 28 |
|     |     | RT_AS103_r13_307_T | CCCACATCCAGTACTGTYGYTGATTTGT    | 28 |
|     |     | RT_AS103_r14_307_T | CCCACATCCAGTACTGTYGYTGATTTGC    | 28 |
|     |     | RT_AS103_r15_307_T | CCCACATCCAGTACTGTYGYTGATTTGG    | 28 |
|     |     | RT_AS103_r16_307_T | CCCACATCCAGTACTGTYGYTGATTTAT    | 28 |
|     |     | RT_AS103_r17_307_T | CCCACATCCAGTACTGTYGYTGATTTAC    | 28 |
|     |     | RT_AS103_r18_307_T | CCCACATCCAGTACTGTYGYTGATTTAG    | 28 |
|     | 308 | RT_AS103_r1_308_T  | CCCACATCCAGTAYTGTYACTGATTTTT    | 27 |
|     |     | RT_AS103_r2_308_T  | CCCACATCCAGTAYTGTYACTGATTTG     | 27 |
|     |     | RT_AS103_r3_308_T  | CCCACATCCAGTAYTGTYACTGATTTA     | 27 |
|     |     | RT_AS103_r4_308_T  | CCCACATCCAGTAYTGTYATTGATTTTT    | 27 |
|     |     | RT_AS103_r5_308_T  | CCCACATCCAGTAYTGTYATTGATTTG     | 27 |
|     |     | RT_AS103_r6_308_T  | CCCACATCCAGTAYTGTYATTGATTTA     | 27 |
|     |     | RT_AS103_r7_308_T  | CCCACATCCAGTAYTGTYGCTGATTTTT    | 27 |
|     |     | RT_AS103_r8_308_T  | CCCACATCCAGTAYTGTYGCTGATTTG     | 27 |
|     |     | RT_AS103_r9_308_T  | CCCACATCCAGTAYTGTYGCTGATTTA     | 27 |
|     |     | RT_AS103_r10_308_T | CCCACATCCAGTAYTGTYGTTGATTTTT    | 27 |
|     |     | RT_AS103_r11_308_T | CCCACATCCAGTAYTGTYGTTGATTTG     | 27 |
|     |     | RT_AS103_r12_308_T | CCCACATCCAGTAYTGTYGTTGATTTA     | 27 |
|     | 309 | RT_AS103_r1_309_T  | CCCACATCYAGTAYTGTTACTGATTTT     | 26 |
|     |     | RT_AS103_r2_309_T  | CCCACATCYAGTAYTGTTATTGATTTT     | 26 |
|     |     | RT_AS103_r3_309_T  | CCCACATCYAGTAYTGTTGCTGATTTT     | 26 |
|     |     | RT_AS103_r4_309_T  | CCCACATCYAGTAYTGTTGTTGATTTT     | 26 |
|     |     | RT_AS103_r5_309_T  | CCCACATCYAGTAYTGTCACTGATTTT     | 26 |
|     |     | RT_AS103_r6_309_T  | CCCACATCYAGTAYTGTCATTGATTTT     | 26 |
|     |     | RT_AS103_r7_309_T  | CCCACATCYAGTAYTGTCGCTGATTTT     | 26 |

|     |     |                   |                                   |    |
|-----|-----|-------------------|-----------------------------------|----|
|     |     | RT_AS103_r8_309_T | CCCACATCYAGTAYTGTGCGTTGATTT       | 26 |
| 106 | 316 | RT_AS106_r1_316_C | ATGCATCACCCACATCYAGTAYTGTTA       | 27 |
|     |     | RT_AS106_r2_316_C | ATGCATCACCCACATCYAGTAYTGTTG       | 27 |
|     |     | RT_AS106_r3_316_C | ATGCATCACCCACATCYAGTAYTGTC        | 27 |
|     |     | RT_AS106_r4_316_C | ATGCATCACCCACATCYAGTAYTGTCG       | 27 |
|     | 317 | RT_AS106_r1_317_A | ATGCATCACCCACATCYAGTACTGTT        | 26 |
|     |     | RT_AS106_r2_317_A | ATGCATCACCCACATCYAGTACTGTC        | 26 |
|     |     | RT_AS106_r3_317_A | ATGCATCACCCACATCYAGTATTGTT        | 26 |
|     |     | RT_AS106_r4_317_A | ATGCATCACCCACATCYAGTATTGTC        | 26 |
|     | 318 | RT_AS106_r1_318_T | AAWATGCATCACCCACATCCAGTACTGT      | 28 |
|     |     | RT_AS106_r2_318_T | AAWATGCATCACCCACATCCAGTATTGT      | 28 |
|     |     | RT_AS106_r3_318_T | AAWATGCATCACCCACATCTAGTACTGT      | 28 |
|     |     | RT_AS106_r4_318_T | AAWATGCATCACCCACATCTAGTATTGT      | 28 |
| 108 | 322 | RT_AS108_r1_322_C | AAWATGCATCACCCACATCCAGTA          | 24 |
|     |     | RT_AS108_r2_322_C | AAWATGCATCACCCACATCTAGTA          | 24 |
|     | 323 | RT_AS108_r1_323_A | AAWATGCATCACCCACATCCAGT           | 23 |
|     |     | RT_AS108_r2_323_A | AAWATGCATCACCCACATCTAGT           | 23 |
|     | 324 | RT_AS108_r1_324_T | AAWATGCATCACCCACATCCAG            | 22 |
|     |     | RT_AS108_r2_324_T | AAWATGCATCACCCACATCTAG            | 22 |
| 115 | 343 | RT_AS115_f1_343_T | ACARTACTRGATGTGGGTGATGCA          | 24 |
|     | 344 | RT_AS115_f1_344_A | ACARTACTRGATGTGGGTGATGCAT         | 25 |
|     | 345 | RT_AS115_f1_345_T | ACARTACTRGATGTGGGTGATGCATA        | 26 |
|     |     | RT_AS115_f2_345_T | ACARTACTRGATGTGGGTGATGCATT        | 26 |
| 116 | 346 | RT_AS116_r1_346_A | CTGAAKTCTTYATCTAAGGGAAGTGA        | 28 |
|     |     | RT_AS116_r2_346_A | CTGAAKTCTTYATCTAAGGGAAGTGAAT      | 28 |
|     |     | RT_AS116_r3_346_A | CTGAAKTCTTYATCTAAGGGAAGTGA        | 28 |
|     |     | RT_AS116_r4_346_A | CTGAAKTCTTYATCTAAGGGAAGTGA        | 28 |
|     |     | RT_AS116_r5_346_A | CTGAAKTCTTYATCTAAGGGAAGTGA        | 28 |
|     |     | RT_AS116_r6_346_A | CTGAAKTCTTYATCTAAGGGAAGTGA        | 28 |
|     |     | RT_AS116_r7_346_A | CTGAAKTCTTYATCTAAGGGAAGTGA        | 28 |
|     |     | RT_AS116_r8_346_A | CTGAAKTCTTYATCTAAGGGAAGTGA        | 28 |
|     | 347 | RT_AS116_r1_347_A | CTGAAKTCTTYATCTAAGGGAAGTGA        | 27 |
|     |     | RT_AS116_r2_347_A | CTGAAKTCTTYATCTAAGGGAAGTGA        | 27 |
|     |     | RT_AS116_r3_347_A | CTGAAKTCTTYATCTAAGGGAAGTGA        | 27 |
|     |     | RT_AS116_r4_347_A | CTGAAKTCTTYATCTAAGGGAAGTGA        | 27 |
|     | 348 | RT_AS116_r1_348_A | CTGAAKTCTTYATCTAAGGGAAGTGA        | 26 |
|     |     | RT_AS116_r2_348_A | CTGAAKTCTTYATCTAAGGGAAGTGA        | 26 |
| 118 | 352 | RT_AS118_r1_352_C | TATACTTYCTGAAKTCTTTATCTAAGGGAA    | 30 |
|     |     | RT_AS118_r2_352_C | TATACTTYCTGAAKTCTTTCATCTAAGGGAA   | 30 |
|     | 353 | RT_AS118_r_353_A  | GTATACTTYCTGAAKTCTTTATCTAAGGGAA   | 30 |
|     | 354 | RT_AS118_r1_354_A | AGTATACTTYCTGAAKTCTTTATCTAAGGGAA  | 30 |
|     |     | RT_AS118_r2_354_A | AGTATACTTYCTGAAKTCTTTCATCTAAGGGAA | 30 |
| 151 | 451 | RT_AS151_r1_451_G | GGAATATTGCTGGTGATCCTTTCCATCCCT    | 30 |
|     |     | RT_AS151_r2_451_G | GGAATATTGCTGGTGATCCTTTCCATCCCA    | 30 |
|     | 452 | RT_AS151_r1_452_T | TGGAATATTGCTGGTGATCCTTTCCATCCC    | 30 |
|     | 453 | RT_AS151_r1_453_C | TTGGAATATTGCTGGTGATCCTTTCCATCC    | 30 |
| 179 | 353 | RT_AS179_f1_535_G | GAGCCTTTTAGAAAAACAAAATCCAGACATA   | 30 |
|     |     | RT_AS179_f2_535_G | GAGCCTTTTAGAAAAACAAAATCCAGAAATA   | 30 |
|     | 356 | RT_AS179_f1_536_T | AGCCTTTTAGAAAAACAAAATCCAGACATAG   | 30 |
|     |     | RT_AS179_f2_536_T | AGCCTTTTAGAAAAACAAAATCCAGAAATAG   | 30 |

|     |     |                   |                                |    |
|-----|-----|-------------------|--------------------------------|----|
|     | 357 | RT_AS179_f1_537_C | GCCTTTTAGAAAACAAAATCCAGACATAGT | 30 |
|     |     | RT_AS179_f2_537_C | GCCTTTTAGAAAACAAAATCCAGAAATAGT | 30 |
| 181 | 451 | RT_AS181_f1_541_T | TTTAGAAAACAAAATCCAGAMATAGTCATC | 30 |
|     |     | RT_AS181_f2_541_T | TTTAGAAAACAAAATCCAGAMATAGTTATC | 30 |
|     | 452 | RT_AS181_f1_542_A | TTAGAAAACAAAATCCAGAMATAGTTATCT | 30 |
|     |     | RT_AS181_f2_542_A | TTAGAAAACAAAATCCAGAMATAGTCATCT | 30 |
|     | 453 | RT_AS181_f1_543_T | TAGAAAACAAAATCCAGAMATAGTTATCTA | 30 |
|     |     | RT_AS181_r1_543_A | TACHTACAAATCATCIATGTATTG       | 24 |
|     |     | RT_AS181_r2_543_A | TACHTACAAATCATCIACGTATTG       | 24 |
| 184 | 550 | RT_AS184_f1_550_A | CAAAATCCAGAMATAGTYATCTATCAATAC | 30 |
|     |     | RT_AS184_f2_550_A | CAAAATCCAGAMATAGTYATCTGTCAATAC | 30 |
|     | 551 | RT_AS184_f1_551_T | AAAATCCAGAMATAGTYATCTATCAATACA | 30 |
|     |     | RT_AS184_f2_551_T | AAAATCCAGAMATAGTYATCTATCAATACG | 30 |
|     |     | RT_AS184_f3_551_T | AAAATCCAGAMATAGTYATCTGTCAATACA | 30 |
|     |     | RT_AS184_f4_551_T | AAAATCCAGAMATAGTYATCTGTCAATACG | 30 |
|     | 552 | RT_AS184_f1_552_G | AAATCCAGAMATAGTYATCTATCAATACAT | 30 |
|     |     | RT_AS184_f2_552_G | AAATCCAGAMATAGTYATCTATCAATACGT | 30 |
|     |     | RT_AS184_f3_552_G | AAATCCAGAMATAGTYATCTGTCAATACAT | 30 |
|     |     | RT_AS184_f4_552_G | AAATCCAGAMATAGTYATCTGTCAATACGT | 30 |
| 188 | 562 | RT_AS188_f1_562_T | ATAGTTATCTRTCAATACRTGGATGATTTG | 30 |
|     |     | RT_AS188_f2_562_T | ATAGTTATCTRTCAATACRTTGATGATTTG | 30 |
|     |     | RT_AS188_f3_562_T | ATAGTTATCTRTCAATACRTCGATGATTTG | 30 |
|     |     | RT_AS188_f4_562_T | ATAGTTATCTRTCAATACRTAGATGATTTG | 30 |
|     | 563 | RT_AS188_f1_563_A | TAGTTATCTRTCAATACRTGGATGATTTGT | 30 |
|     |     | RT_AS188_f2_563_A | TAGTTATCTRTCAATACRTTGATGATTTGT | 30 |
|     |     | RT_AS188_f3_563_A | TAGTTATCTRTCAATACRTCGATGATTTGT | 30 |
|     |     | RT_AS188_f4_563_A | TAGTTATCTRTCAATACRTAGATGATTTGT | 30 |
|     |     | RT_AS188_f5_563_A | TAGTTATCTRTCAATACRTGGATGATTTGC | 30 |
|     |     | RT_AS188_f6_563_A | TAGTTATCTRTCAATACRTTGATGATTTGC | 30 |
|     |     | RT_AS188_f7_563_A | TAGTTATCTRTCAATACRTCGATGATTTGC | 30 |
|     |     | RT_AS188_f8_563_A | TAGTTATCTRTCAATACRTAGATGATTTGC | 30 |
|     | 564 | RT_AS188_f1_564_T | AGTTATCTRTCAATACATIGATGATTTGTA | 30 |
|     |     | RT_AS188_f2_564_T | AGTTATCTRTCAATACATIGATGATTTGTT | 30 |
|     |     | RT_AS188_f3_564_T | AGTTATCTRTCAATACATIGATGATTTGCA | 30 |
|     |     | RT_AS188_f4_564_T | AGTTATCTRTCAATACATIGATGATTTGCT | 30 |
|     |     | RT_AS188_f5_564_T | AGTTATCTRTCAATACGTIGATGATTTGTA | 30 |
|     |     | RT_AS188_f6_564_T | AGTTATCTRTCAATACGTIGATGATTTGTT | 30 |
|     |     | RT_AS188_f7_564_T | AGTTATCTRTCAATACGTIGATGATTTGCA | 30 |
|     |     | RT_AS188_f8_564_T | AGTTATCTRTCAATACGTIGATGATTTGCT | 30 |
| 190 | 568 | RT_AS190_r1_568_C | TCTATGYTGYYCTATTTCTAAGTCAGATC  | 29 |
|     |     | RT_AS190_r2_568_C | TCTATGYTGYYCTATTTCTAAGTCAGATG  | 29 |
|     |     | RT_AS190_r3_568_C | TCTATGYTGYYCTATTTCTAAGTCAGATT  | 29 |
|     |     | RT_AS190_r4_568_C | TCTATGYTGYYCTATTTCTAAGTCAGAAC  | 29 |
|     |     | RT_AS190_r5_568_C | TCTATGYTGYYCTATTTCTAAGTCAGAAG  | 29 |
|     |     | RT_AS190_r6_568_C | TCTATGYTGYYCTATTTCTAAGTCAGAAT  | 29 |
|     | 569 | RT_AS190_r1_569_C | TCTATGYTGYYCTATTTCTAAGTCAGAT   | 28 |
|     |     | RT_AS190_r2_569_C | TCTATGYTGYYCTATTTCTAAGTCAGAA   | 28 |
|     |     | RT_AS190_r3_569_C | TCTATGYTGYYCTATTTCTAAGTCAGAT   | 28 |
|     |     | RT_AS190_r4_569_C | TCTATGYTGYYCTATTTCTAAGTCAGAA   | 28 |
|     | 570 | RT_AS190_r1_570_T | TCTATGYTGYYCTATTTCTAAGTCAGA    | 27 |
|     |     | RT_AS190_r2_570_T | TCTATGYTGYYCTATTTCTAAGTCAGA    | 27 |
| 210 | 628 | RT_AS210_f1_628_T | CAAAAATAGAGGAACTGAGACAACATCTG  | 29 |

|     |     |                    |                                |    |
|-----|-----|--------------------|--------------------------------|----|
|     |     | RT_AS210_f2_628_T  | CAAAAATAGAGGAACTGAGAGAACATCTG  | 29 |
| 629 |     | RT_AS210_f1_629_T  | CAAAAATAGAGGAACTGAGASAACATCTGT | 30 |
|     |     | RT_AS210_f2_629_T  | CAAAAATAGAGGAACTGAGASAACATCTGG | 30 |
| 630 |     | RT_AS210_f1_630_G  | AAAAATAGAGGAACTGAGASAACATCTGTT | 30 |
|     |     | RT_AS210_f2_630_G  | AAAAATAGAGGAACTGAGASAACATCTGTG | 30 |
|     |     | RT_AS210_f3_630_G  | AAAAATAGAGGAACTGAGASAACATCTGGT | 30 |
|     |     | RT_AS210_f4_630_G  | AAAAATAGAGGAACTGAGASAACATCTGGG | 30 |
| 215 | 643 | RT_AS215_f1_643_A  | AACATCTGKTIAGGTGGGGATTT        | 23 |
|     |     | RT_AS215_f2_643_A  | AACATCTGKTIAGGTGGGGGTTT        | 23 |
|     |     | RT_AS215_f3_643_A  | AACATCTGKTIAGGTGGGGATTT        | 23 |
|     |     | RT_AS215_f4_643_A  | AACATCTGKTIAGGTGGGGGTTT        | 23 |
|     |     | RT_AS215_f5_643_A  | AACATCTGKGIAGGTGGGGATTT        | 23 |
|     |     | RT_AS215_f6_643_A  | AACATCTGKGIAGGTGGGGGTTT        | 23 |
|     |     | RT_AS215_f7_643_A  | AACATCTGKGIAGGTGGGGATTT        | 23 |
|     |     | RT_AS215_f8_643_A  | AACATCTGKGIAGGTGGGGGTTT        | 23 |
| 644 |     | RT_AS215_f1_644_C  | AACATCTGKTIAGGTGGGGATTTA       | 24 |
|     |     | RT_AS215_f2_644_C  | AACATCTGKTIAGGTGGGGGTTA        | 24 |
|     |     | RT_AS215_f3_644_C  | AACATCTGKTIAGGTGGGGATTTA       | 24 |
|     |     | RT_AS215_f4_644_C  | AACATCTGKTIAGGTGGGGGTTA        | 24 |
|     |     | RT_AS215_f5_644_C  | AACATCTGKGIAGGTGGGGATTTA       | 24 |
|     |     | RT_AS215_f6_644_C  | AACATCTGKGIAGGTGGGGGTTA        | 24 |
|     |     | RT_AS215_f7_644_C  | AACATCTGKGIAGGTGGGGATTTA       | 24 |
|     |     | RT_AS215_f8_644_C  | AACATCTGKGIAGGTGGGGGTTA        | 24 |
|     |     | RT_AS215_f9_644_C  | AACATCTGKTIAGGTGGGGATTTT       | 24 |
|     |     | RT_AS215_f10_644_C | AACATCTGKTIAGGTGGGGGTTT        | 24 |
|     |     | RT_AS215_f11_644_C | AACATCTGKTIAGGTGGGGATTTT       | 24 |
|     |     | RT_AS215_f12_644_C | AACATCTGKTIAGGTGGGGGTTT        | 24 |
|     |     | RT_AS215_f13_644_C | AACATCTGKGIAGGTGGGGATTTT       | 24 |
|     |     | RT_AS215_f14_644_C | AACATCTGKGIAGGTGGGGGTTT        | 24 |
|     |     | RT_AS215_f15_644_C | AACATCTGKGIAGGTGGGGATTTT       | 24 |
|     |     | RT_AS215_f16_644_C | AACATCTGKGIAGGTGGGGGTTT        | 24 |
|     |     | RT_AS215_f17_644_C | AACATCTGKTIAGGTGGGGATTTG       | 24 |
|     |     | RT_AS215_f18_644_C | AACATCTGKTIAGGTGGGGGTTG        | 24 |
|     |     | RT_AS215_f19_644_C | AACATCTGKTIAGGTGGGGATTTG       | 24 |
|     |     | RT_AS215_f20_644_C | AACATCTGKTIAGGTGGGGGTTG        | 24 |
|     |     | RT_AS215_f21_644_C | AACATCTGKGIAGGTGGGGATTTG       | 24 |
|     |     | RT_AS215_f22_644_C | AACATCTGKGIAGGTGGGGGTTG        | 24 |
|     |     | RT_AS215_f23_644_C | AACATCTGKGIAGGTGGGGATTTG       | 24 |
|     |     | RT_AS215_f24_644_C | AACATCTGKGIAGGTGGGGGTTG        | 24 |
| 645 |     | RT_AS215_f1_645_C  | AACATCTGTKIARGTGGGGATTTAC      | 25 |
|     |     | RT_AS215_f2_645_C  | AACATCTGTKIARGTGGGGATTTAA      | 25 |
|     |     | RT_AS215_f3_645_C  | AACATCTGTKIARGTGGGGATTTAT      | 25 |
|     |     | RT_AS215_f4_645_C  | AACATCTGTKIARGTGGGGATTTAG      | 25 |
|     |     | RT_AS215_f5_645_C  | AACATCTGTKIARGTGGGGATTTTC      | 25 |
|     |     | RT_AS215_f6_645_C  | AACATCTGTKIARGTGGGGATTTTA      | 25 |
|     |     | RT_AS215_f7_645_C  | AACATCTGTKIARGTGGGGATTTTT      | 25 |
|     |     | RT_AS215_f8_645_C  | AACATCTGTKIARGTGGGGATTTTG      | 25 |
|     |     | RT_AS215_f9_645_C  | AACATCTGTKIARGTGGGGATTTGC      | 25 |
|     |     | RT_AS215_f10_645_C | AACATCTGTKIARGTGGGGATTTGA      | 25 |
|     |     | RT_AS215_f11_645_C | AACATCTGTKIARGTGGGGATTTGT      | 25 |
|     |     | RT_AS215_f12_645_C | AACATCTGTKIARGTGGGGATTTGG      | 25 |
|     |     | RT_AS215_f13_645_C | AACATCTGTKIARGTGGGGGTTTAC      | 25 |
|     |     | RT_AS215_f14_645_C | AACATCTGTKIARGTGGGGGTTTAA      | 25 |
|     |     | RT_AS215_f15_645_C | AACATCTGTKIARGTGGGGGTTTAT      | 25 |
|     |     | RT_AS215_f16_645_C | AACATCTGTKIARGTGGGGGTTTAG      | 25 |
|     |     | RT_AS215_f17_645_C | AACATCTGTKIARGTGGGGGTTTTC      | 25 |

|     |     |                    |                                |    |
|-----|-----|--------------------|--------------------------------|----|
|     |     | RT_AS215_f18_645_C | AACATCTGTGIARGTGGGGGTTTTA      | 25 |
|     |     | RT_AS215_f19_645_C | AACATCTGTGIARGTGGGGGTTTTT      | 25 |
|     |     | RT_AS215_f20_645_C | AACATCTGTGIARGTGGGGGTTTTG      | 25 |
|     |     | RT_AS215_f21_645_C | AACATCTGTGIARGTGGGGGTTTTGC     | 25 |
|     |     | RT_AS215_f22_645_C | AACATCTGTGIARGTGGGGGTTTTGA     | 25 |
|     |     | RT_AS215_f23_645_C | AACATCTGTGIARGTGGGGGTTTTGT     | 25 |
|     |     | RT_AS215_f24_645_C | AACATCTGTGIARGTGGGGGTTTTGG     | 25 |
| 219 | 655 | RT_AS219_f_655_A   | CTGTTGAGGTGGGGATTTACCACACCAGAC | 30 |
|     | 656 | RT_AS219_f_656_A   | TGTTGAGGTGGGGATTTACCACACCAGACA | 30 |
|     | 657 | RT_AS219_f_657_A   | GTTGAGGTGGGGATTTACCACACCAGACAA | 30 |
| 225 | 673 | RT_AS225_r_673_G   | GGAGTTCATAACCCATCCAAAGGAATGGAG | 30 |
|     | 674 | RT_AS225_r_674_G   | TGGAGTTCATAACCCATCCAAAGGAATGGA | 30 |
|     | 675 | RT_AS225_r_675_A   | ATGGAGTTCATAACCCATCCAAAGGAATGG | 30 |
| 227 | 379 | RT_AS227_r_379_A   | CAGGATGGAGTTCATAACCCATCCAAAGGA | 30 |
|     | 380 | RT_AS227_r_380_A   | TCAGGATGGAGTTCATAACCCATCCAAAGG | 30 |
|     | 381 | RT_AS227_r_381_G   | ATCAGGATGGAGTTCATAACCCATCCAAAG | 30 |
| 230 | 688 | RT_AS230_r1_688_T  | TATCARGATGGAGTTCATAACCCA       | 24 |
|     | 689 | RT_AS230_r1_689_A  | GTCCADITATCAGGATGGAGTTCATAACCC | 30 |
|     |     | RT_AS230_r2_689_A  | GTCCADITATCAAGATGGAGTTCATAACCC | 30 |
|     | 690 | RT_AS230_r1_690_C  | TGTCCADITATCAGGATGGAGTTCATAACC | 30 |
|     |     | RT_AS230_r2_690_C  | TGTCCADITATCAAGATGGAGTTCATAACC | 30 |
| 236 | 706 | RT_AS236_r1_706_T  | TATAGGCTGTACTGTCCATTTATCAG     | 26 |
|     |     | RT_AS236_f1_706_C  | YTKGATGGGTTATGAACTCCAT         | 22 |
|     |     | RT_AS236_f2_706_C  | YTKGCTGGGTTATGAACTCCAT         | 22 |
|     |     | RT_AS236_f3_706_C  | YTKTATGGGTTATGAACTCCAT         | 22 |
|     |     | RT_AS236_f4_706_C  | YTKTCTGGGTTATGAACTCCAT         | 22 |
|     | 707 | RT_AS236_r1_707_A  | AGCYYTATAGGCTGTACTGTCCATTTATCA | 30 |
|     |     | RT_AS236_f1_707_C  | TKGATGGGTTATGAACTCCATC         | 22 |
|     |     | RT_AS236_f2_707_C  | TKGCTGGGTTATGAACTCCATC         | 22 |
|     |     | RT_AS236_f3_707_C  | TKTATGGGTTATGAACTCCATC         | 22 |
|     | 708 | RT_AS236_r1_708_C  | CAGCYYTATAGGCTGTACTGTCCATTTATC | 30 |
|     |     | RT_AS236_f4_707_C  | TKTCTGGGTTATGAACTCCATC         | 22 |
|     |     | RT_AS236_f1_708_T  | TKKATGGGTTATGAACTCCATCC        | 23 |
|     |     | RT_AS236_f2_708_T  | TKKATGGGTTATGAACTCCATCT        | 23 |
|     |     | RT_AS236_f3_708_T  | TKKCTGGGTTATGAACTCCATCC        | 23 |
|     |     | RT_AS236_f4_708_T  | TKKCTGGGTTATGAACTCCATCT        | 23 |
| 238 | 712 | RT_AS238_r1_712_T  | CTGGCAGCWYTATAGGCTGTACTGTCCATT | 30 |
|     |     | RT_AS238_r2_712_T  | CTGGCAGCWYTATAGGCTGTACTGTCCATC | 30 |
|     |     | RT_AS238_r3_712_T  | CTGGCAGCWYTATAGGCTGTACTGTCCATG | 30 |
|     |     | RT_AS238_r4_712_T  | CTGGCAGCWYTATAGGCTGTACTGTCCAAT | 30 |
|     |     | RT_AS238_r5_712_T  | CTGGCAGCWYTATAGGCTGTACTGTCCAAC | 30 |
|     |     | RT_AS238_r6_712_T  | CTGGCAGCWYTATAGGCTGTACTGTCCAAG | 30 |
|     |     | RT_AS238_r7_712_T  | CTGGCAGCWYTATAGGCTGTACTGTCCAGT | 30 |
|     |     | RT_AS238_r8_712_T  | CTGGCAGCWYTATAGGCTGTACTGTCCAGC | 30 |
|     |     | RT_AS238_r9_712_T  | CTGGCAGCWYTATAGGCTGTACTGTCCAGG | 30 |
|     | 713 | RT_AS238_r1_713_T  | TCTGGCAGCWYTATAGGCTGTACTGTCCAT | 30 |
|     |     | RT_AS238_r2_713_T  | TCTGGCAGCWYTATAGGCTGTACTGTCCAA | 30 |
|     |     | RT_AS238_r3_713_T  | TCTGGCAGCWYTATAGGCTGTACTGTCCAG | 30 |
|     | 714 | RT_AS238_r1_714_T  | TTCTGGCAGCWYTATAGGCTGTACTGTCCA | 30 |
